# Supplementary material for: Quantitative proteomic profiling of extracellular matrix and site-specific collagen post-translational modifications in an in vitro model of lung fibrosis
Source: PubMed Central journal article supplement — Matrix Biol Plus. 2019 Apr 13;1:100005. doi: 10.1016/j.mbplus.2019.04.002 (PMC7852317; doi:10.1016/j.mbplus.2019.04.002), 2019-04-13
Supplement: mmc1.pdf [file mmc1.pdf]

**Quantitative Proteomic Profiling of Transforming Growth Factor- $\beta$ 1-Induced Extracellular Matrix Changes and Collagen Post-translational Modifications in primary human lung fibroblasts**

Juliane Merl-Pham<sup>a,#</sup>, Trayambak Basak<sup>b,#</sup>, Larissa Knüppel<sup>c</sup>, Deepak Ramanujam<sup>d</sup>, Mark Athanason<sup>b</sup>, Jürgen Behr<sup>e,f</sup>, Stefan Engelhardt<sup>d</sup>, Oliver Eickelberg<sup>c,g</sup>, Stefanie Hauck<sup>a</sup>, Roberto Vanacore<sup>b,\*</sup>, and Claudia A. Staab-Weijnitz<sup>c,\*</sup>

<sup>a</sup> Research Unit Protein Science, Helmholtz Zentrum München, Heidemannstr. 1, 80939 Munich, Germany

<sup>b</sup> Center for Matrix Biology and Department of Medicine, Division of Nephrology and Hypertension, Center for Matrix Biology, Vanderbilt University Medical Center, Nashville, Tennessee 37232, United States of America

<sup>c</sup> Comprehensive Pneumology Center, Helmholtz-Zentrum München, Max-Lebsche-Platz 31, 81377 Munich, Germany; Member of the German Center of Lung Research (DZL)

<sup>d</sup> Institut für Pharmakologie und Toxikologie, Technische Universität München (TUM), Munich, Germany; DZHK (German Center for Cardiovascular Research), partner site Munich Heart Alliance, Munich, Germany.

<sup>e</sup> Asklepios Fachkliniken München-Gauting, Robert-Koch-Allee 2, 82131 Gauting, Germany

<sup>f</sup> Medizinische Klinik und Poliklinik V, Klinikum der Ludwig-Maximilians-Universität, Marchioninistraße 15, 81377 Munich, Germany; Member of the German Center of Lung Research (DZL)

<sup>g</sup> Present address: Pulmonary and Critical Care Medicine University, Colorado Anschutz Medical Campus, Denver, Colorado, United States of America

<sup>#</sup> JM-P and TB contributed equally to this work

--- SUPPLEMENTARY INFORMATION ---

Supplementary Tables S1 and S2

Supplementary Figures S1-S19

**Supplementary Table S1:** Primer table for qRT-PCR analysis, in alphabetical order for gene names. Primers were synthesized by MWG Eurofins (Ebersberg, Germany).

| <b>Target</b> | <b>Forward primer (5'-3')</b> | <b>Reverse primer (5'-3')</b> |
|---------------|-------------------------------|-------------------------------|
| BGN           | ATGACTTCAAGGGTCTCC            | TGGTTCTTGGAGATGTAGA           |
| COL6A1        | GACGCACTCAAAAGCA              | ATCAGGTACTIONTATTCTCCTTCA     |
| COL6A2        | AGAAAGGAGAGCCTGCGGAT          | AGGTCTCCCTCACGTAGGTC          |
| COL6A3        | CTCTACCGAGCCCAGGTGTT          | ATGAGGGTGCGAACGTACTG          |
| COL8A1        | GTATGGCAAAGAGTATCCA           | GTAAACTGGCTAATGGTATTT         |
| CTSK          | GTTACTCCTGTCAAAAATCAG         | TCATTCTCAGACACACAATC          |
| DHX8          | TGACCCAGAGAAGTGGGAGA          | ATCTCAAGGTCCTCATCTTCTTCA      |
| FGF2          | ACCCTCACATCAAGCTAC            | AAGAAACACTCATCCGTAA           |
| GDF15         | CTACGAGGACCTGCTAA             | ACTTCTGGCGTGAGTATC            |
| GPC1          | GACTATTGCCGAAATGTG            | ATGTACCCAGAACTTGTC            |
| HTRA1         | TTGTTTCGCAAGCTTCCGTT          | ACGTGGGCATTTGTCACGAT          |
| LAMA4         | CAAGAACTGTGCAGTGTG            | AGACGCACTTATCACAGC            |
| LAMB2         | CCGATATTTCTCCTATGACT          | ATGGCTCAATCTCTGAGTAG          |
| LGALS1        | AGCAACCTGAATCTCAA             | CAGGTTGTTGCTGTCTTT            |
| LTBP2         | CTGACAAGGGTGACTCTC            | CACTTGTTCTTCTGTATCTC          |
| PLOD2         | GATCTGGTTGTCATGTTTACT         | TGTCTGCTAGTCTTTTATCTG         |
| SEMA7A        | TGTTCCACTCTAAATACCACT         | CCCCTGTCTGTAGTTAGGTA          |
| THSD4         | ATCTTGTAACCCTCAGGAC           | GCGGTCTGTAGTAGTTGTA           |

**Supplementary Table S2:** Primary antibodies used in the different applications. Secondary HRP-linked antibodies were from GE Healthcare Life Sciences (Freiburg, Germany). WB, Western Blot; IF, immunofluorescent staining

| <b>Target</b> | <b>Antibody</b>              | <b>Provider</b>                  | <b>Application</b> |
|---------------|------------------------------|----------------------------------|--------------------|
| ACTA2         | mouse monoclonal anti-ACTA2  | Sigma Aldrich, Louis, MO,<br>USA | IF                 |
| ACTB          | HRP-conjugated anti-ACTB     | Sigma Aldrich, Louis, MO,<br>USA | WB                 |
| BGN           | mouse monoclonal anti-BGN    | Santa Cruz, Dallas, USA          | WB                 |
| CATK          | rabbit polyclonal anti-CATK  | Abcam, Cambridge, UK             | WB                 |
| COL6A1        | mouse monoclonal anti-COL6A1 | Santa Cruz, Dallas, USA          | WB                 |
| GDF15         | goat polyclonal anti-GDF15   | R&D Systems, Minneapolis,<br>USA | WB                 |
| LAMA4         | mouse monoclonal anti-LAMA4  | Santa Cruz, Dallas, USA          | WB                 |
| LAMB2         | mouse monoclonal anti-LAMB2  | Santa Cruz, Dallas, USA          | WB                 |
| PLOD2         | mouse monoclonal anti-PLOD2  | R&D Systems, Minneapolis,<br>USA | WB                 |
| SEMA7A        | mouse monoclonal anti-SEMA7A | Santa Cruz, Dallas, USA          | WB                 |

For **supplementary Table S3**, please refer to separate Excel File.



**Supplementary Figure S1: *In vitro* model used for this study.** Primary human lung fibroblasts cultured in presence of TGF- $\beta$ 1 and 2-phosphoascorbate undergo myofibroblast differentiation and consistently increase expression and secretion of collagens, in particular collagen I [1, 2]. (A) Representative immunofluorescent images show that treatment of phLFs with 2 ng/ml TGF- $\beta$ 1 results in cell hypertrophy, increased expression of  $\alpha$ -smooth muscle actin ( $\alpha$ -SMA, red), and generation of stress fibers, all characteristics of the myofibroblast. Scale bar 50  $\mu$ m. (B) Transcript fold changes (2 ng/ml TGF- $\beta$ 1 vs. ctrl) for COL1A1 (encoding the  $\alpha$ 1-chain of type I collagen, n=12), fibronectin (FN1, n=12), and ACTA2 (encoding  $\alpha$ -SMA, n=4). (C) Representative Western Blot analysis shows increased protein levels of type I collagen and  $\alpha$ -SMA in response to 2 ng/ml TGF- $\beta$ 1. (D) Sircol assay shows increased levels of total secreted collagen (n=14). (E) Quantification of miR-29 expression reveals decreased levels of miR-29b in response to 2 ng/ml TGF- $\beta$ 1 (n=5).

**Supplementary Figure S1**

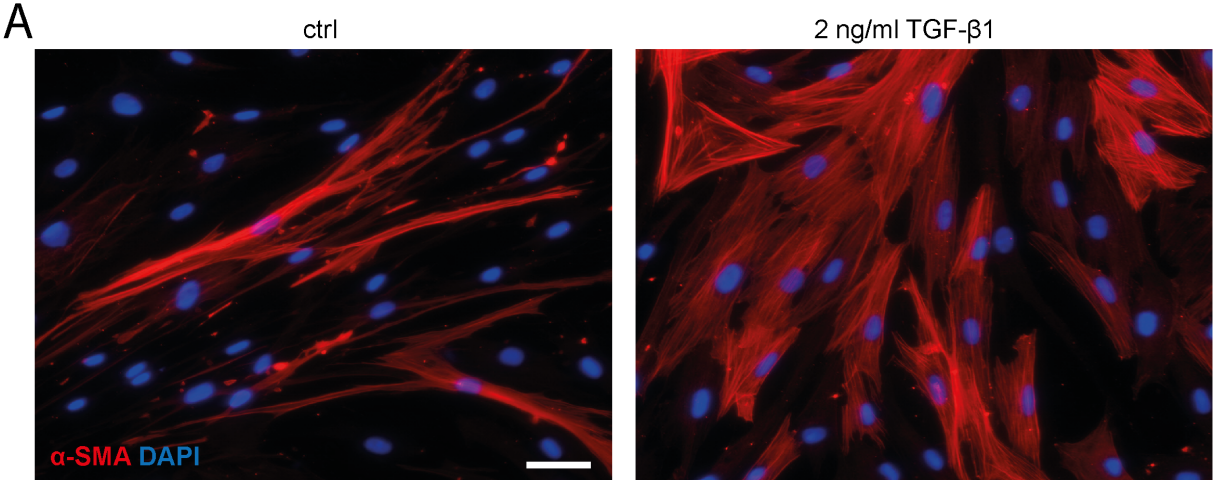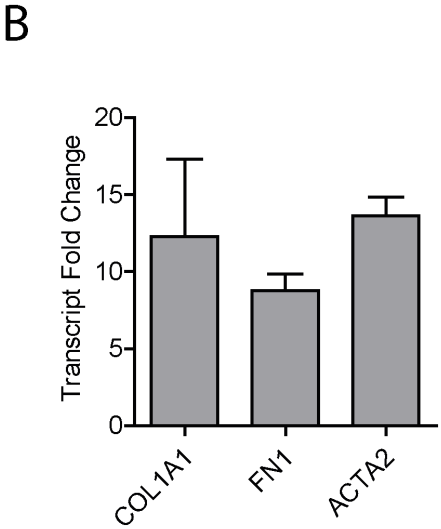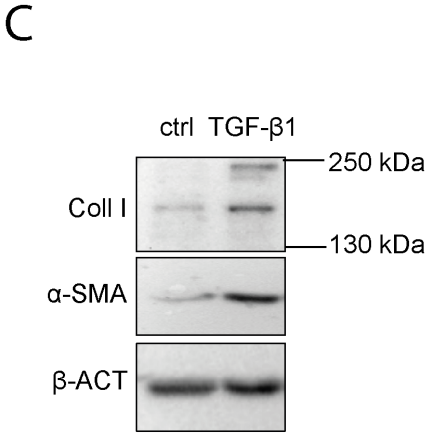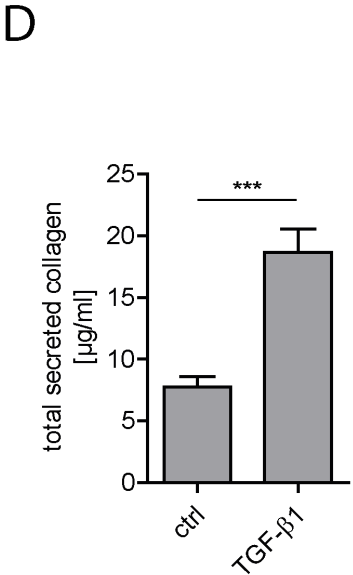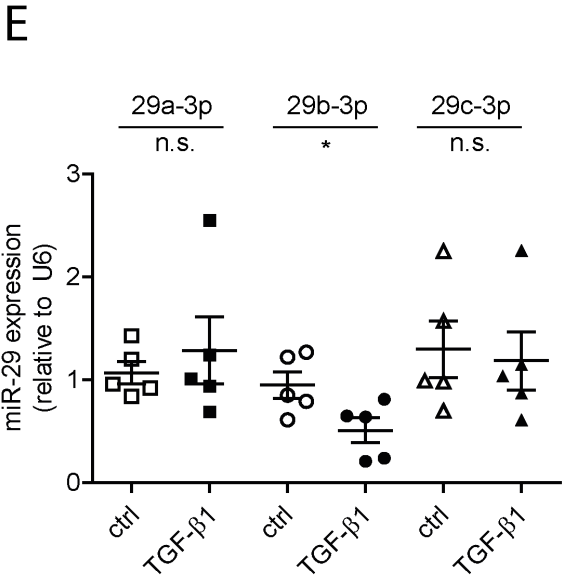

**Supplementary Figure S2:** Correlation analysis of (A) the here presented *in vitro* data set and an ECM data set from the mouse model of bleomycin-induced lung fibrosis [3] and (B) the same mouse model data set with a human ECM data set derived from interstitial lung disease patients [4]. Names are given for proteins that deviate by a log<sub>2</sub> ratio > 1 from the perfect correlation. Collagens are given in red, ECM glycoproteins in green, proteoglycans in blue, ECM regulators in purple, ECM-affiliated proteins in brown, and secreted factors in black.

# Supplementary Figure S2

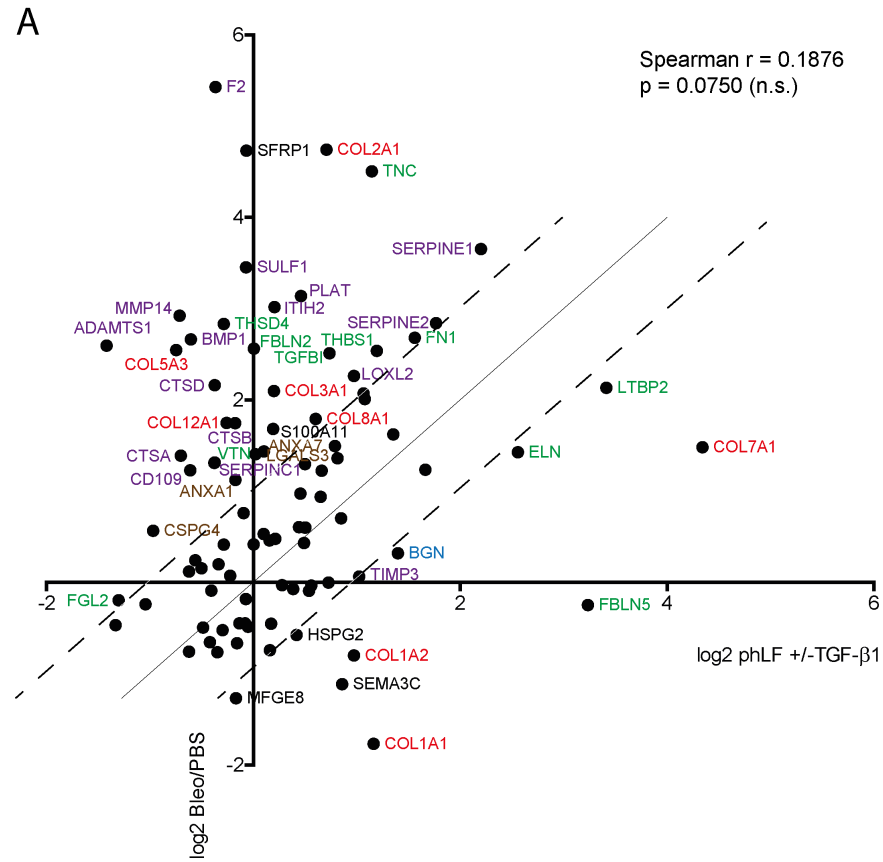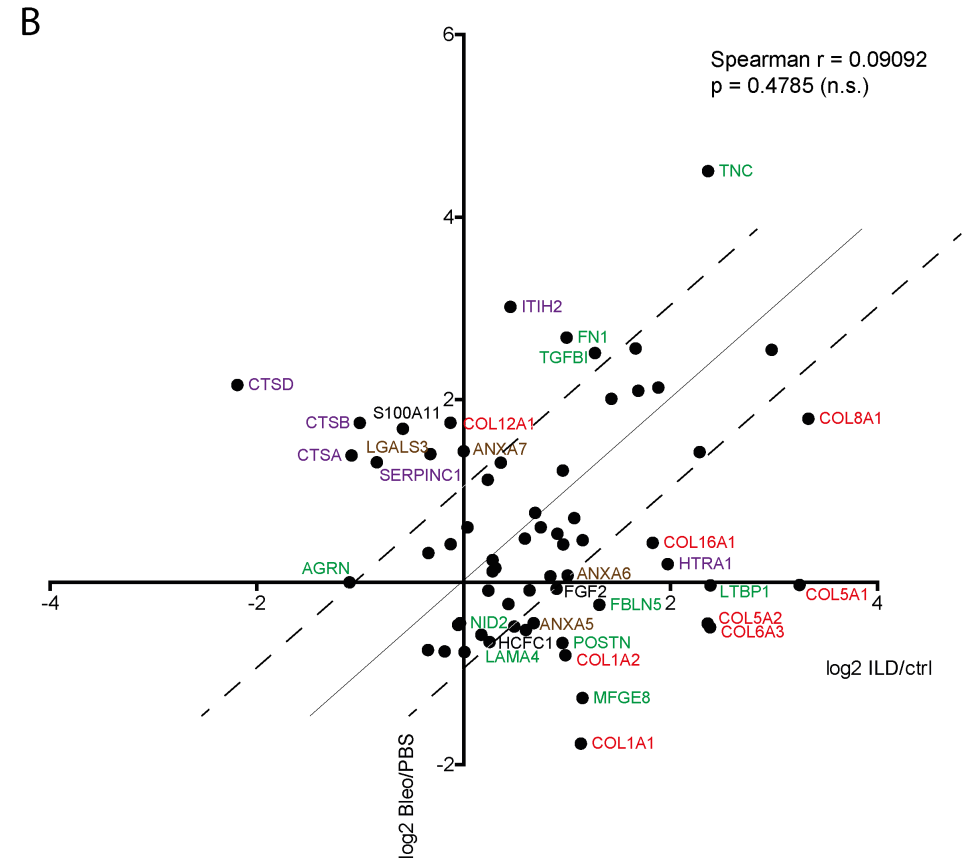

**Supplementary Figures S3-S19:** Peptide spectrum matches (PSMs) of 11 3-hydroxyproline and 6 O-glycosylation sites in human COL1A1 chain. PSMs were annotated using pLABEL [5].

m/z = 667.8230<sup>+2</sup>

PSM showing the identification of 3-Hyp<sup>426</sup>

Human col1a1 chain

Q-Exacte HF, HCD Fragmentation

S3

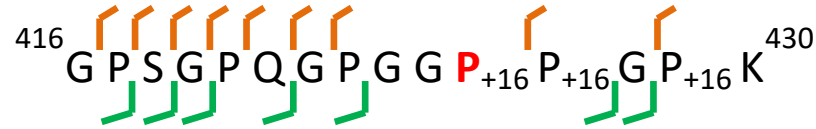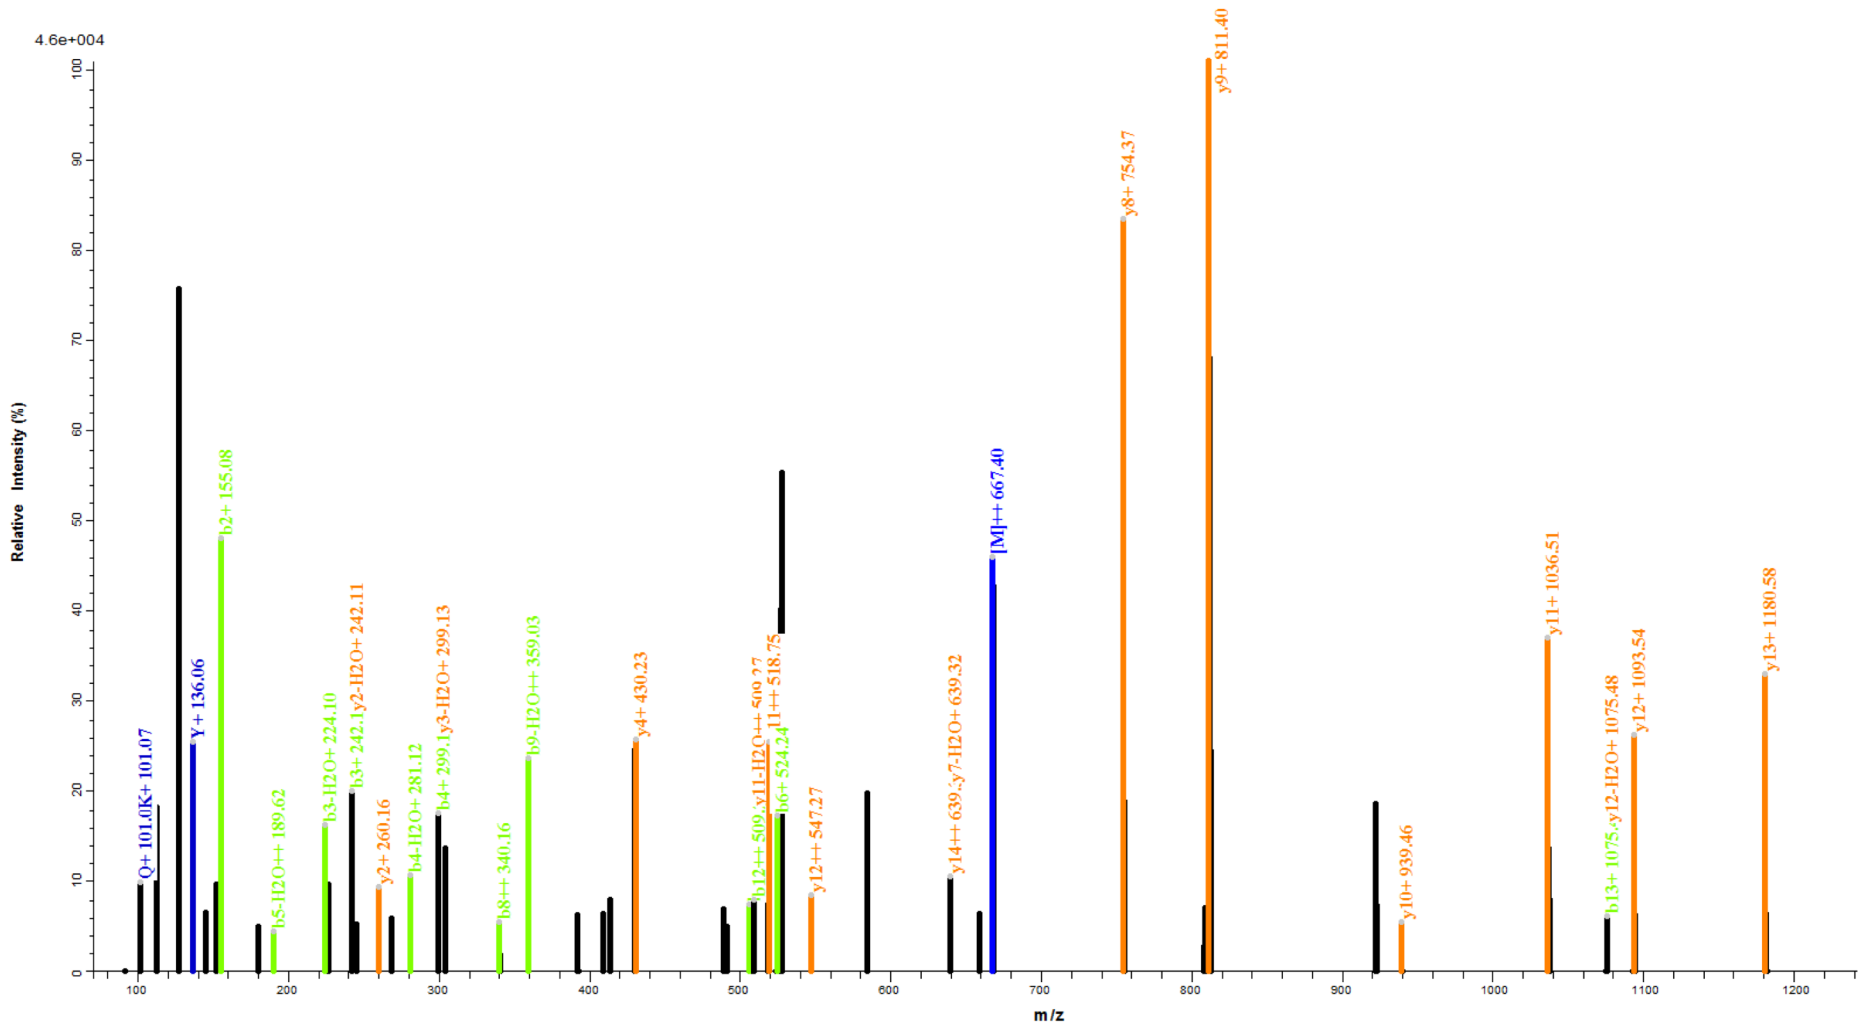

m/z= 691.6630<sup>+3</sup>

PSM showing the identification of 3-Hyp<sup>555,567</sup>

Human col1a1 chain

Q-Exactive HF, HCD Fragmentation

S4

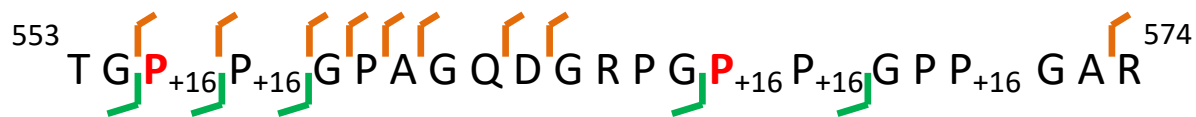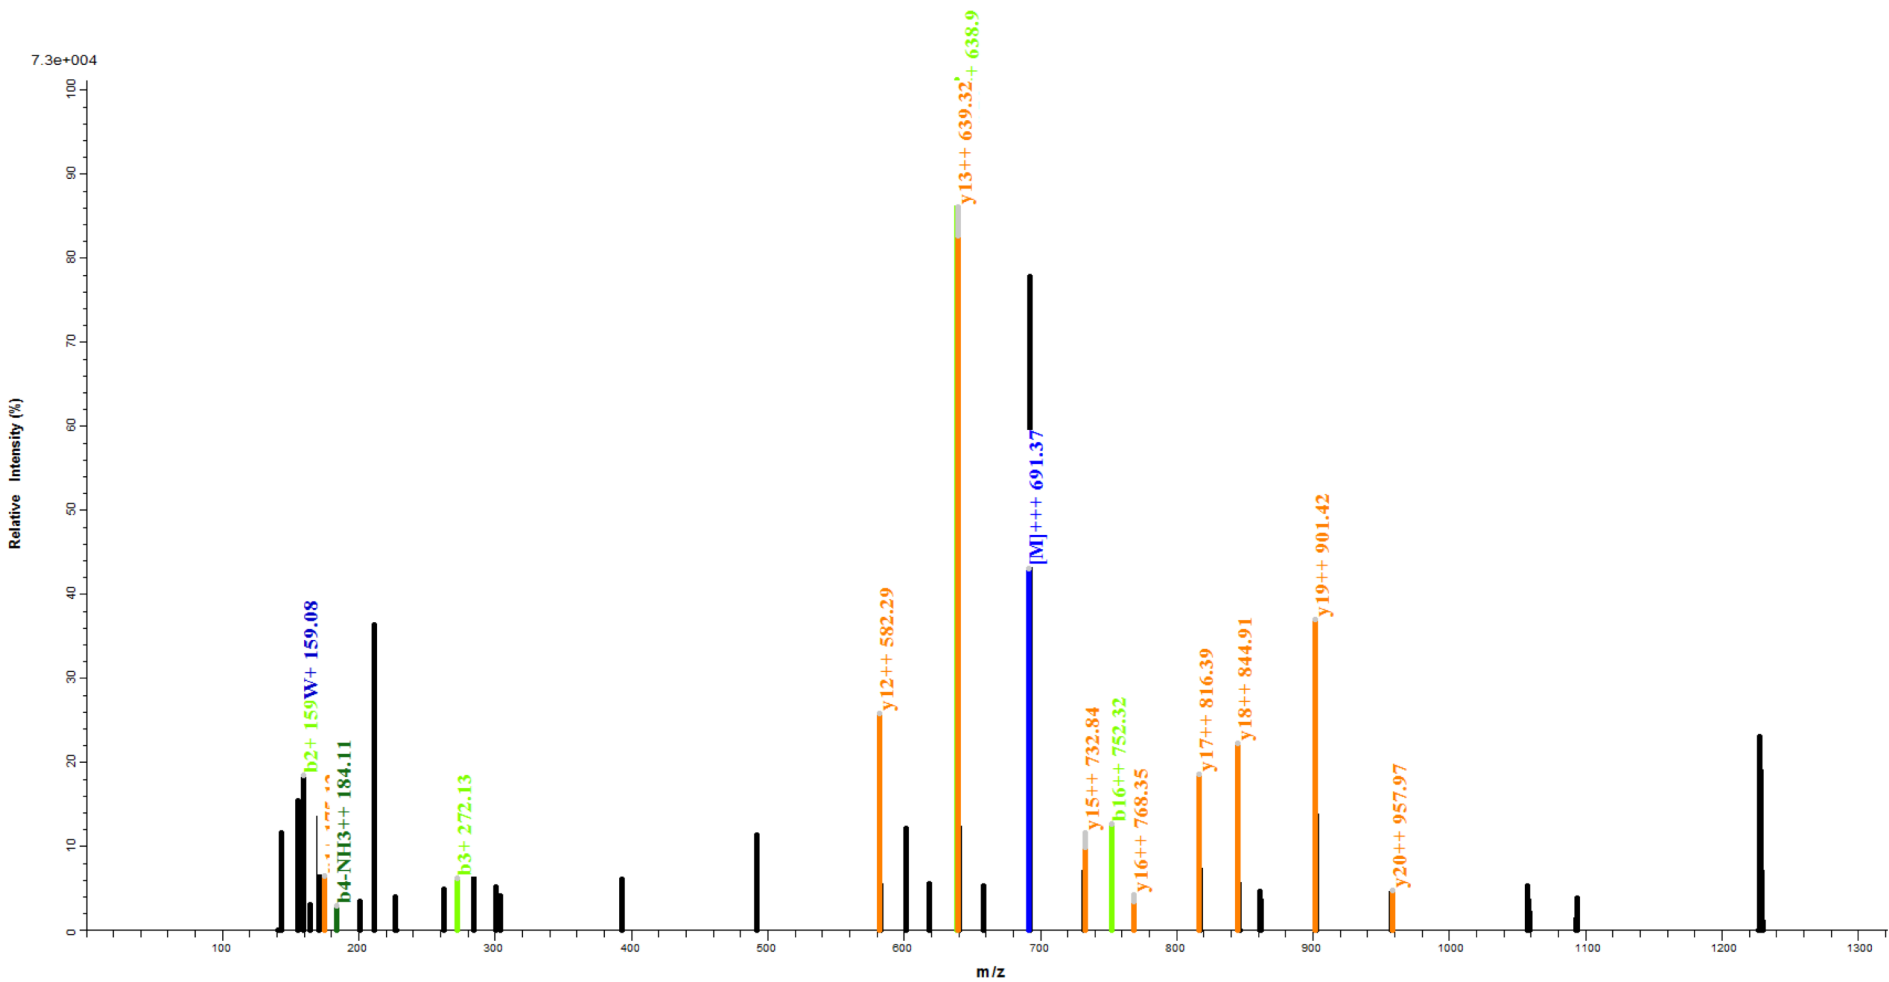

m/z= 561.2893<sup>+2</sup>

PSM showing the identification of 3-Hyp<sup>690</sup>

Human col1a1 chain

Q-Exactive HF, HCD Fragmentation

S5

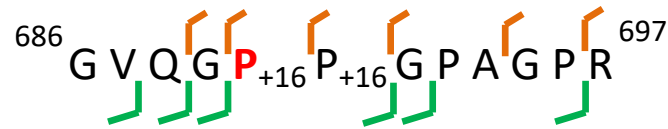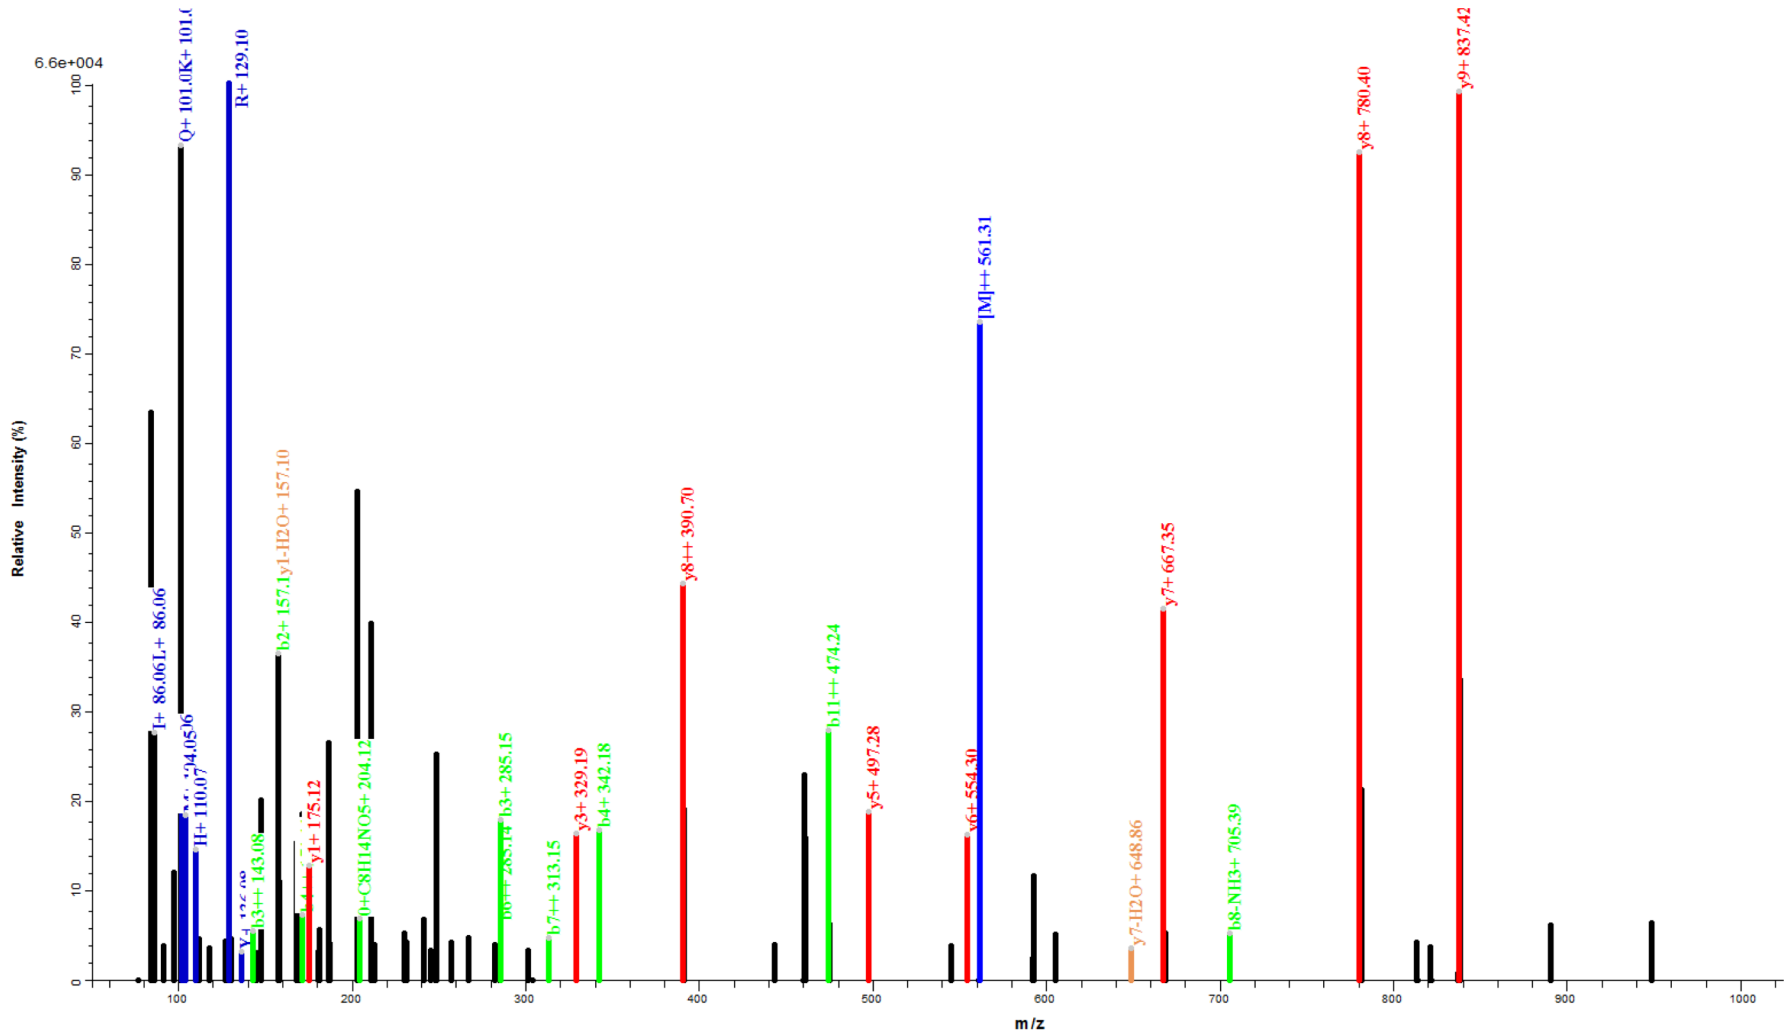



m/z= 930.9402<sup>+2</sup>

PSM showing the identification of 3-Hyp<sup>885,894,897</sup>

Human col1a1 chain

Q-Exactive HF, HCD Fragmentation

S6

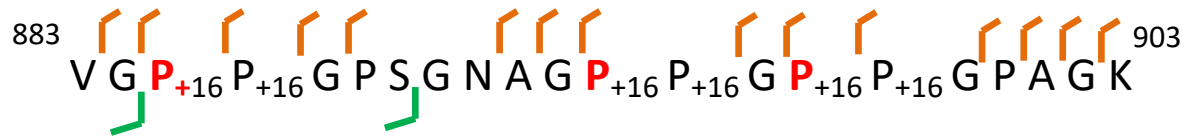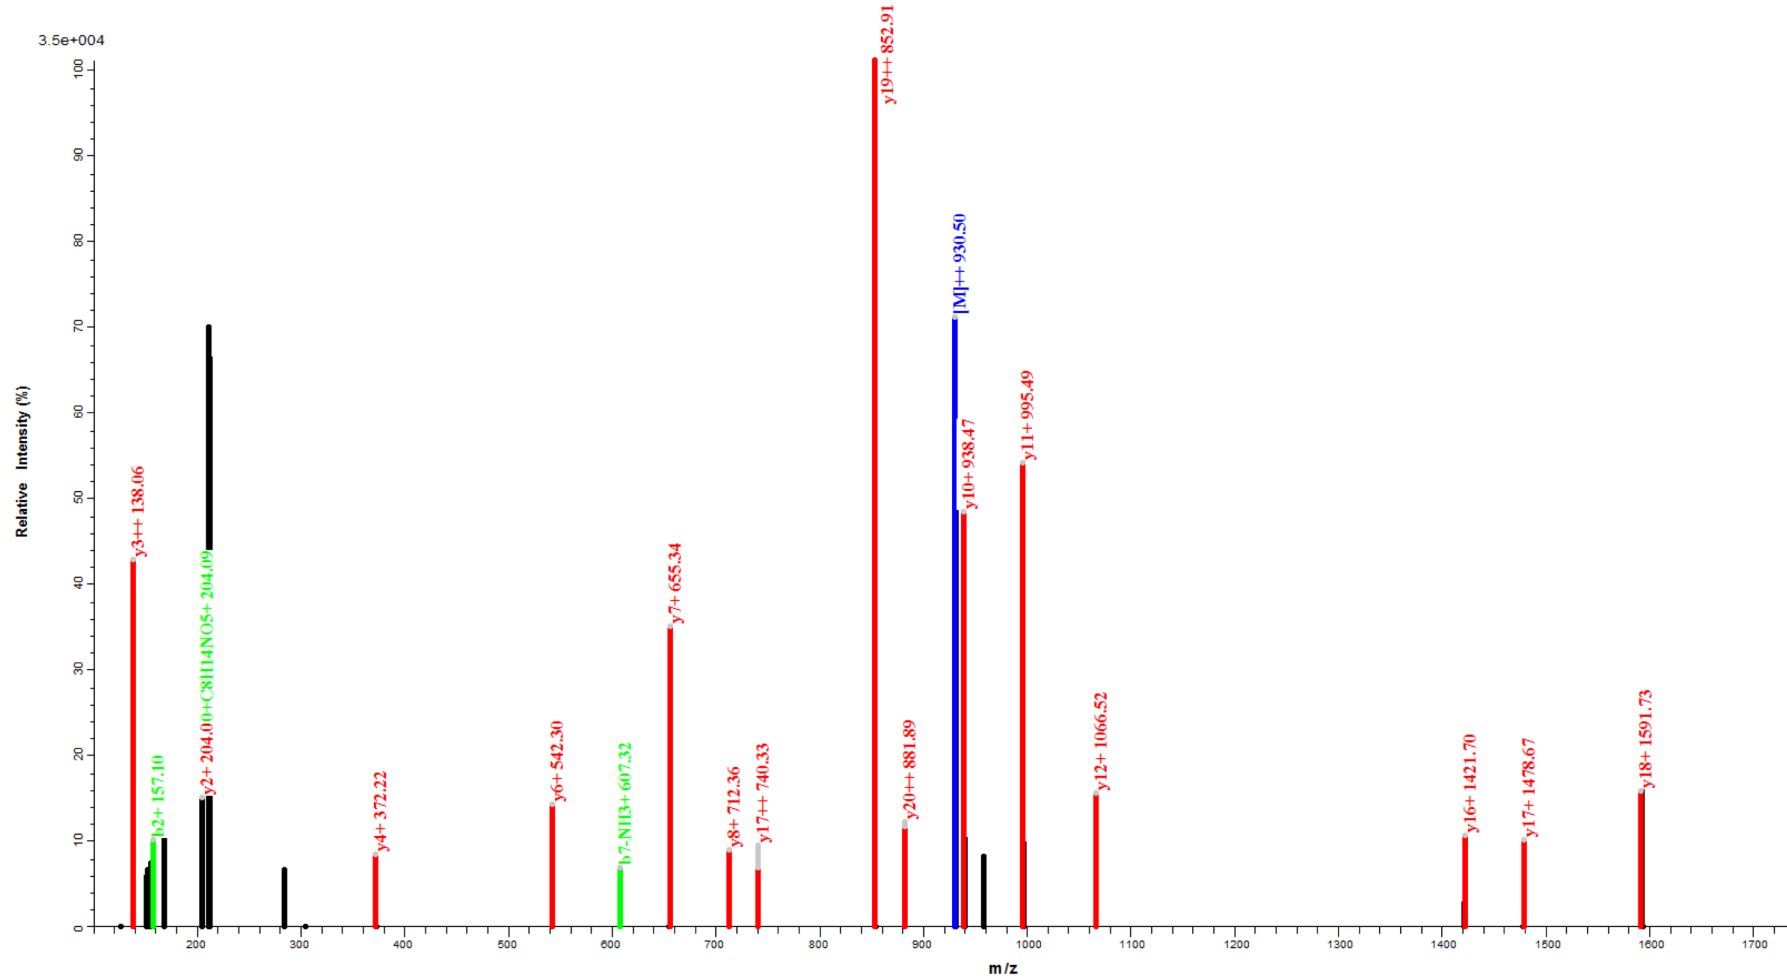

m/z = 1369.1249<sup>+2</sup>

PSM showing the identification of 3-Hyp<sup>1119,1122</sup>

Human col1a1 chain

S7

Q-Exactive HF, HCD Fragmentation

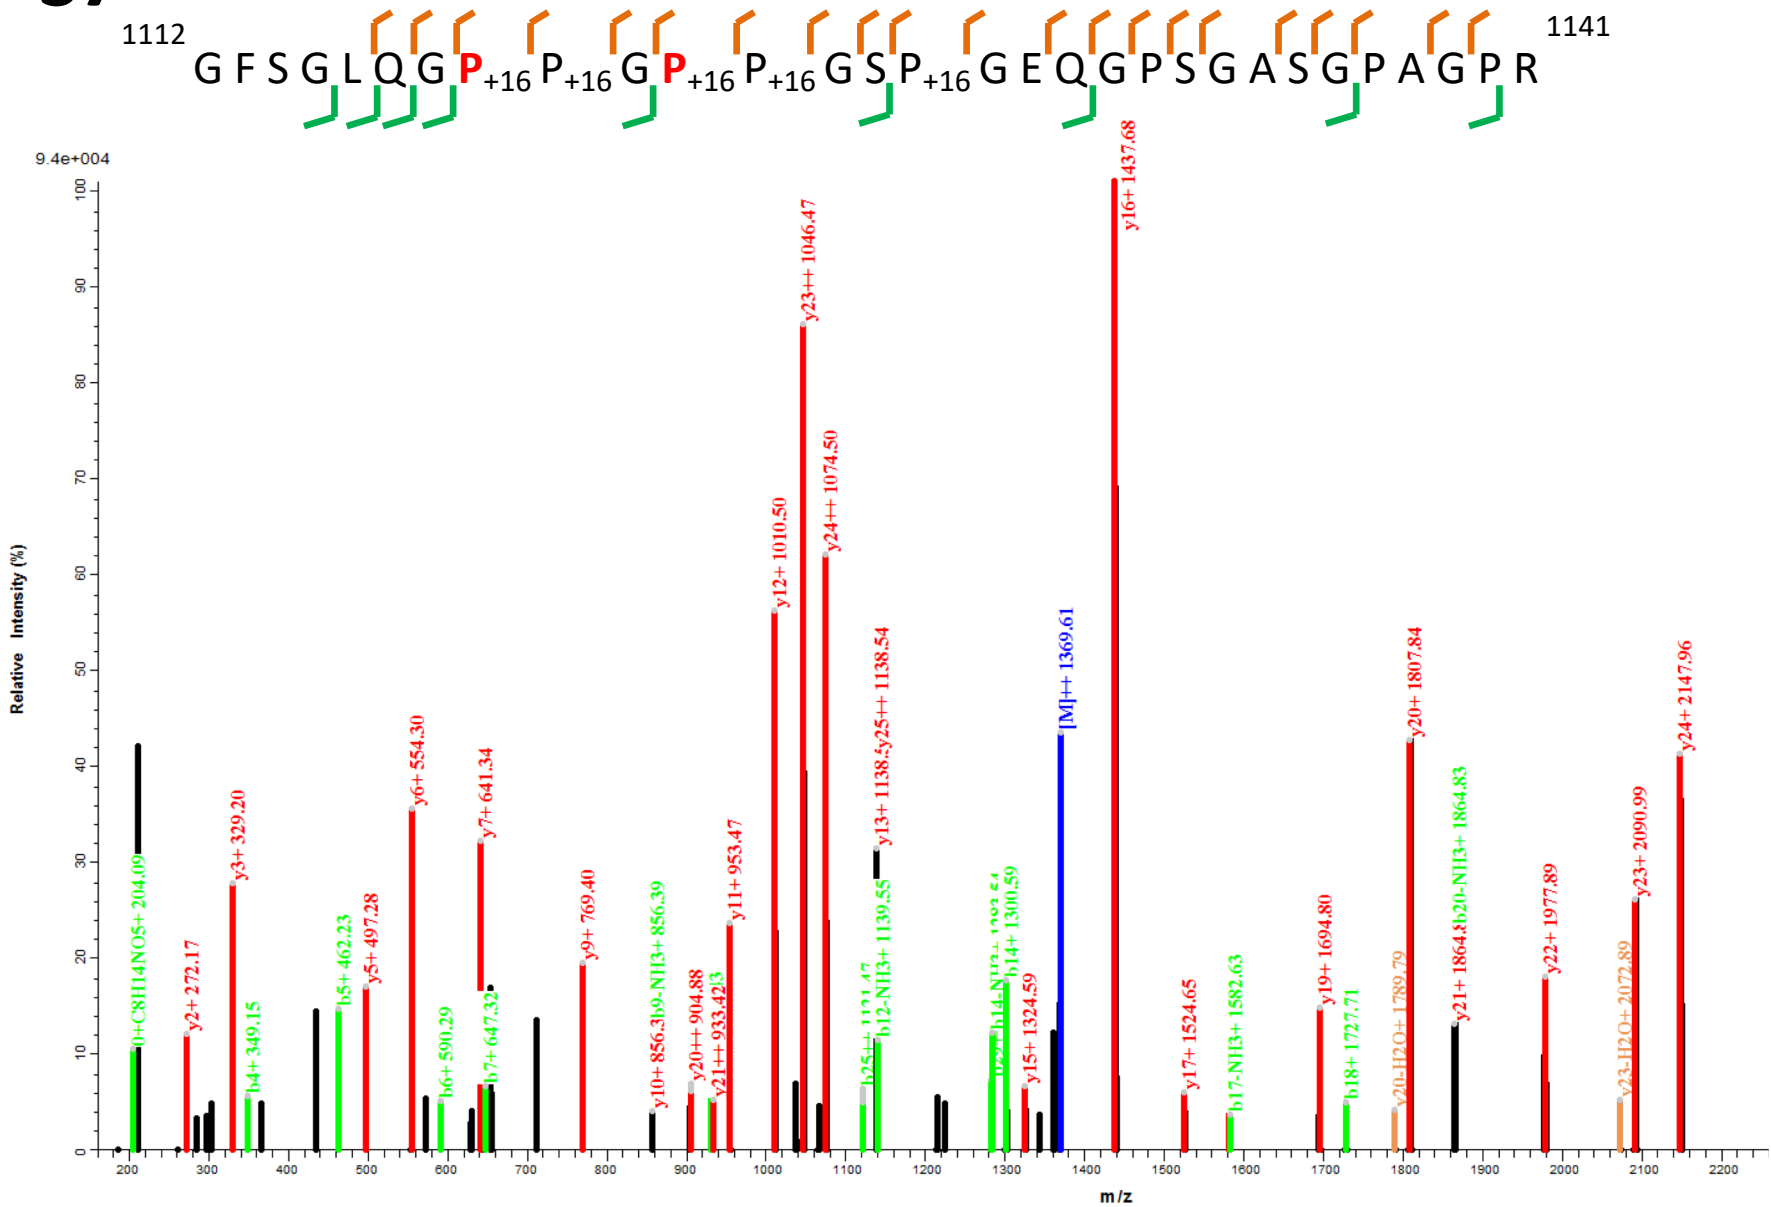

m/z= 781.4037<sup>+2</sup>

PSM showing the identification of 3-Hyp<sup>1164</sup>

Human col1a1 chain

S8

Q-Exactive HF, HCD Fragmentation

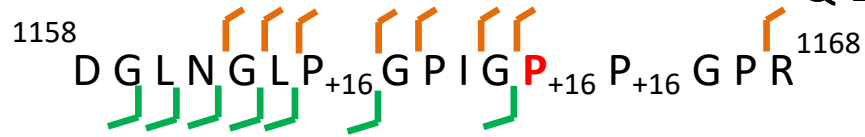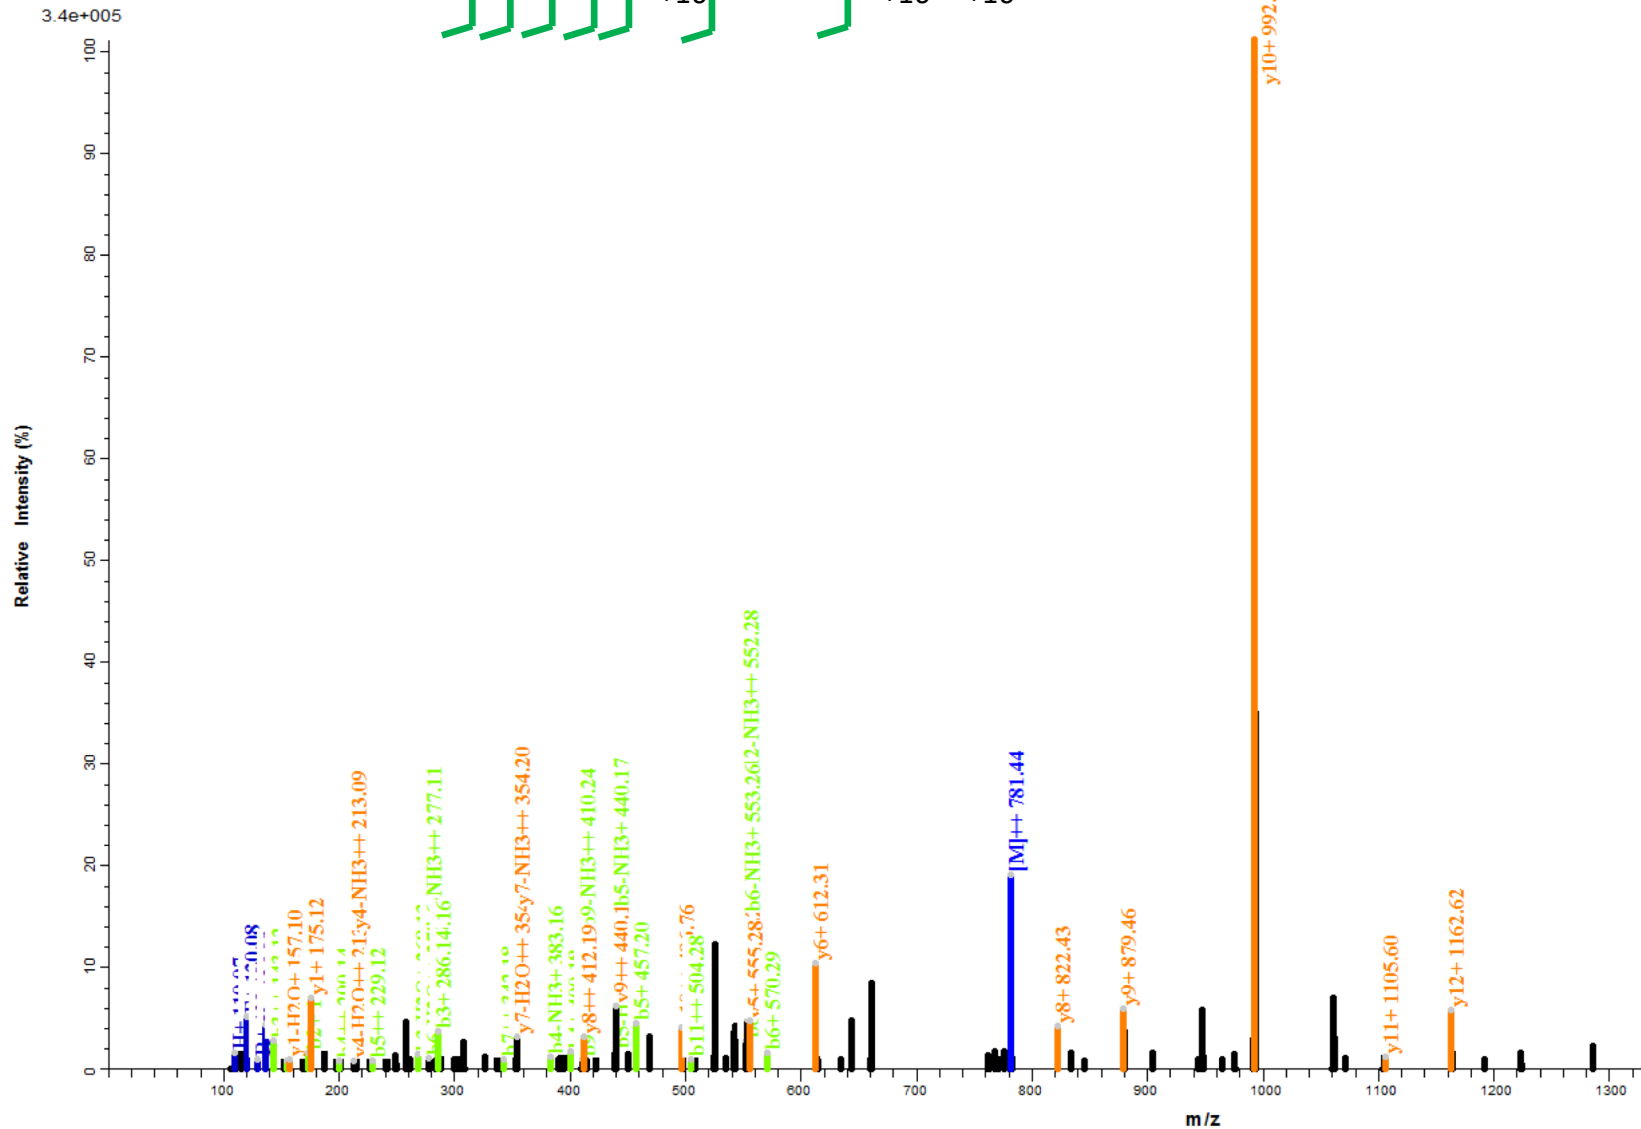

m/z = 1253.9178<sup>+3</sup>

PSM showing the identification of 3-HyP<sup>1179</sup>

Human col1a1 chain

S9

Q-Exactive HF, HCD Fragmentation

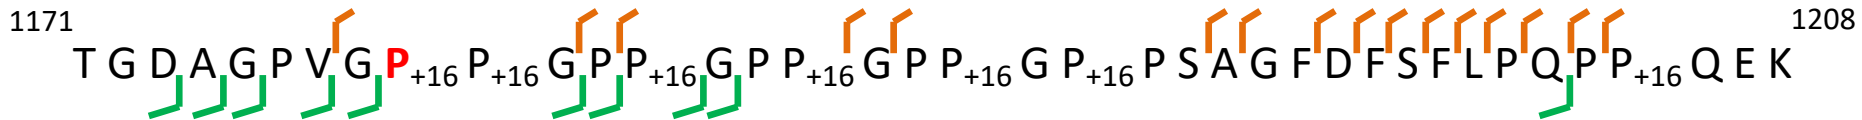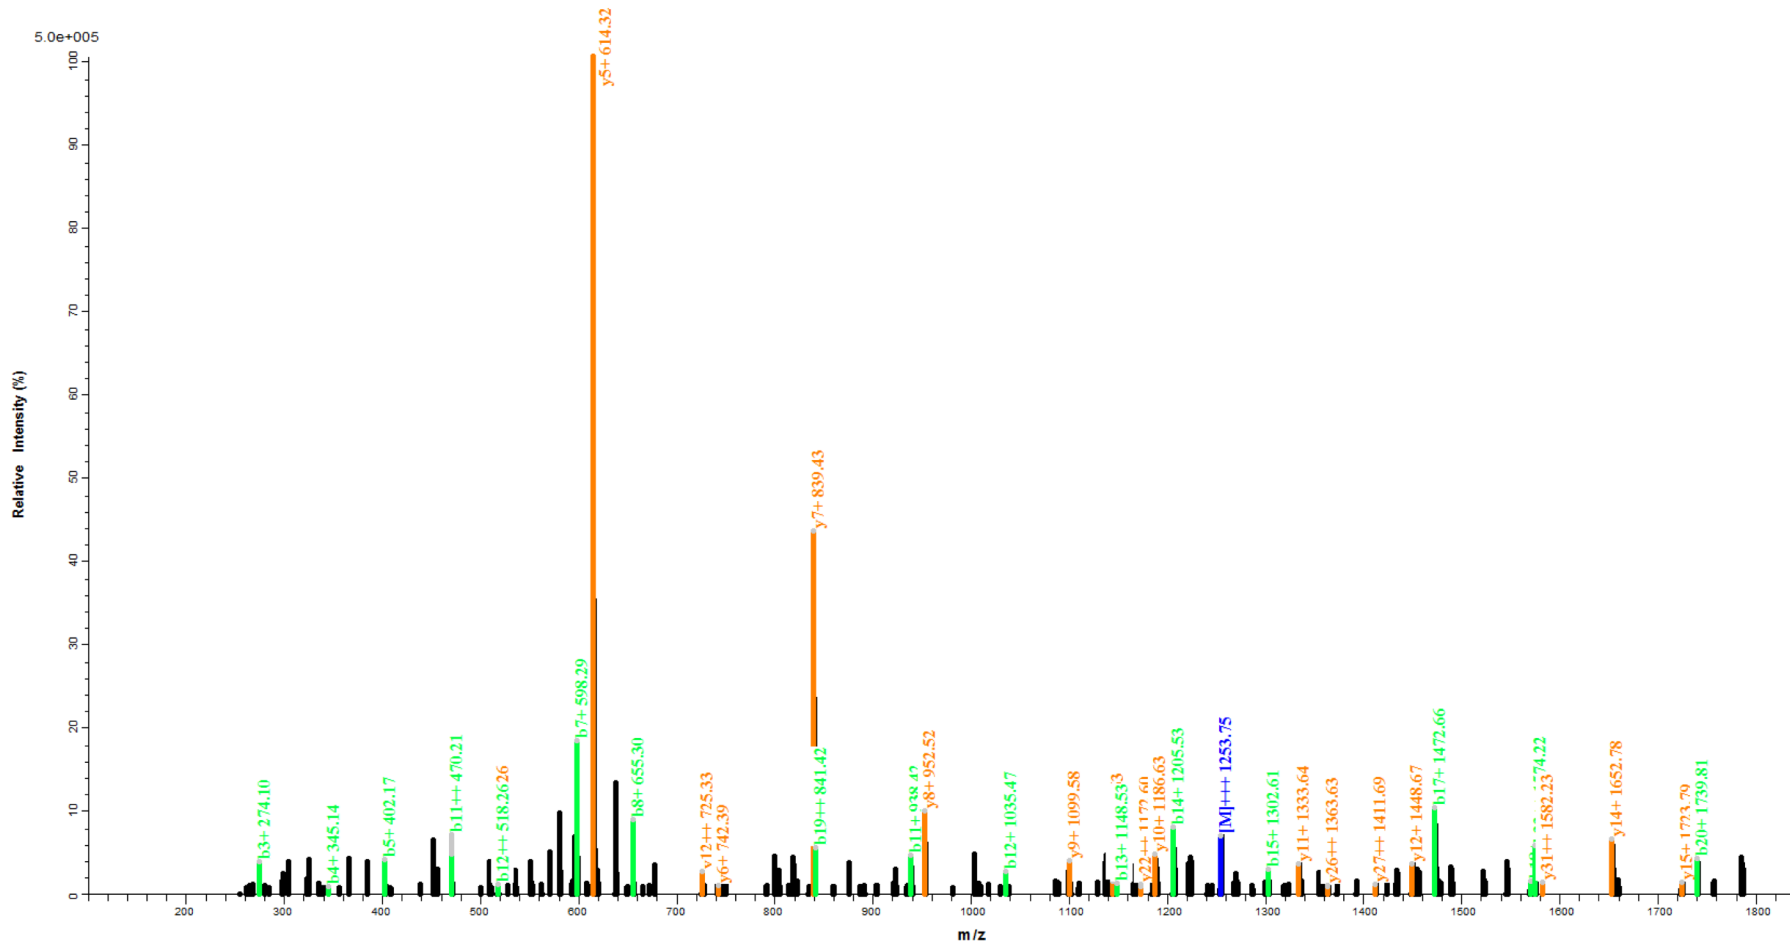

# PSM showing the identification of Glucosylgalactosyl-hydroxylysine<sup>265</sup>

Human col1a1 chain

Q-Exacte HF, HCD Fragmentation

m/z= 910.9429<sup>+2</sup>

## S10

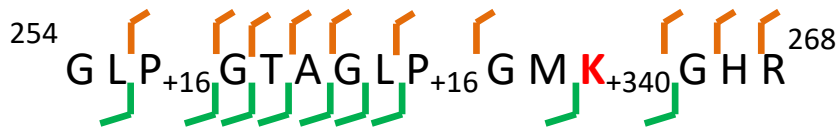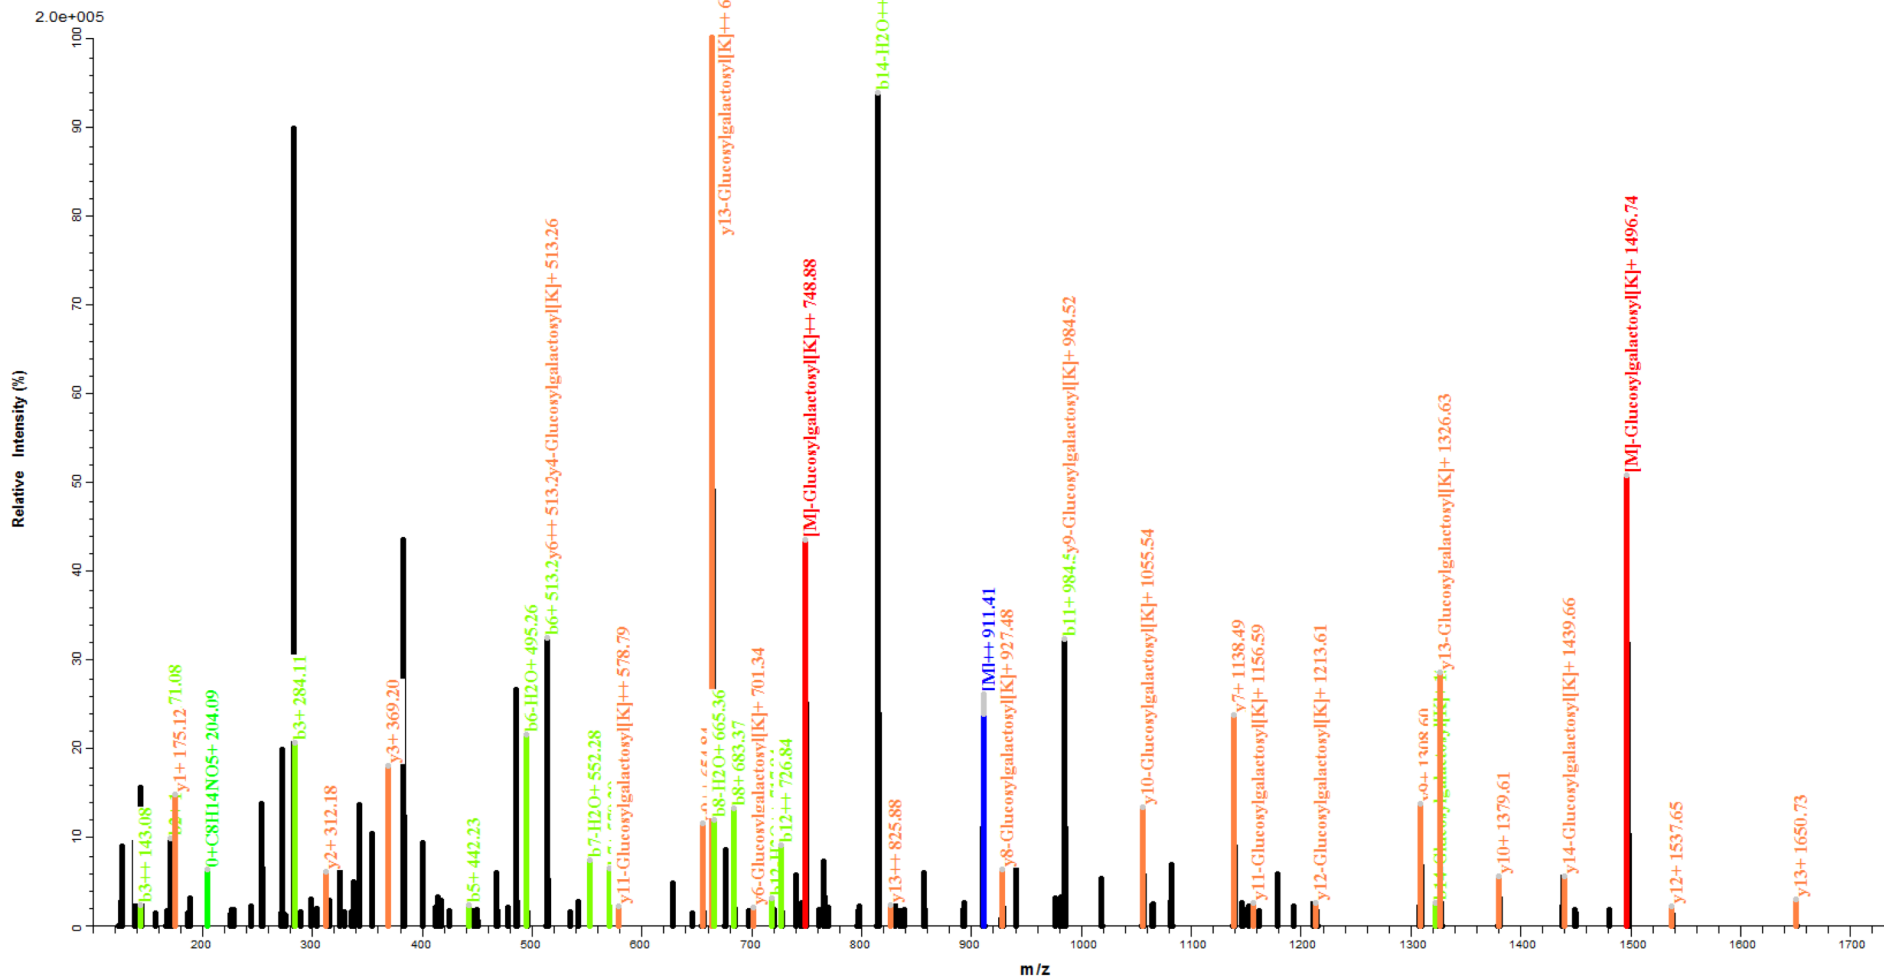

# PSM showing the identification of Galactosyl-hydroxylysine<sup>277</sup>

m/z = 898.4209<sup>+2</sup>

Human col1a1 chain

## S11

Q-Exactive HF, HCD Fragmentation

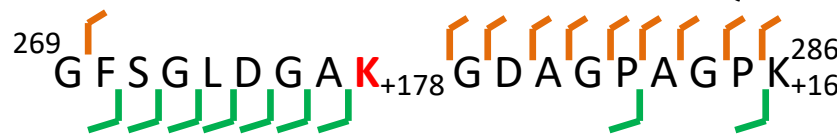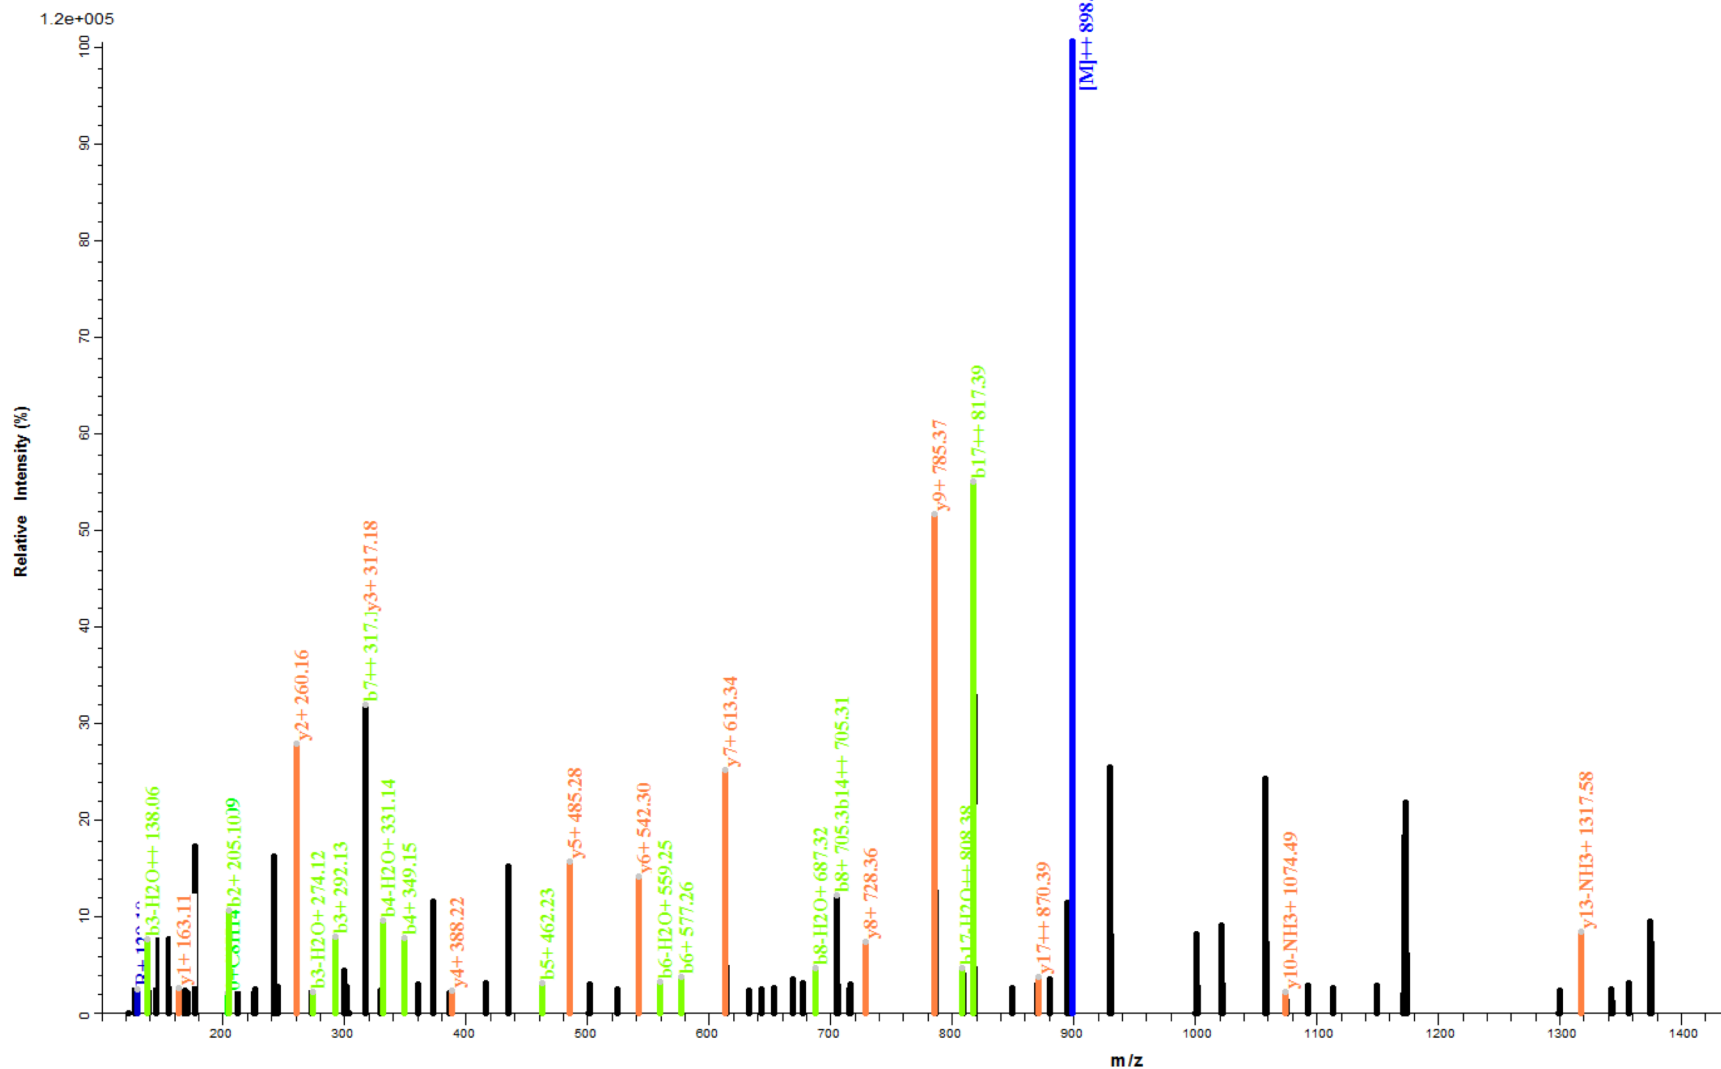

# PSM showing the identification of Glucosylgalactosyl-hydroxylysine<sup>277</sup>

m/z = 979.4489<sup>+2</sup>

Human col1a1 chain

Q-Exacte HF, HCD Fragmentation

## S12

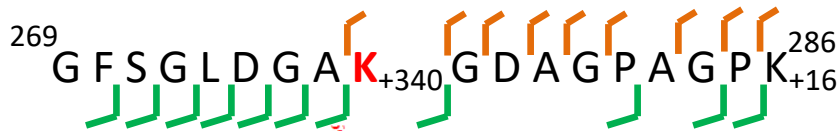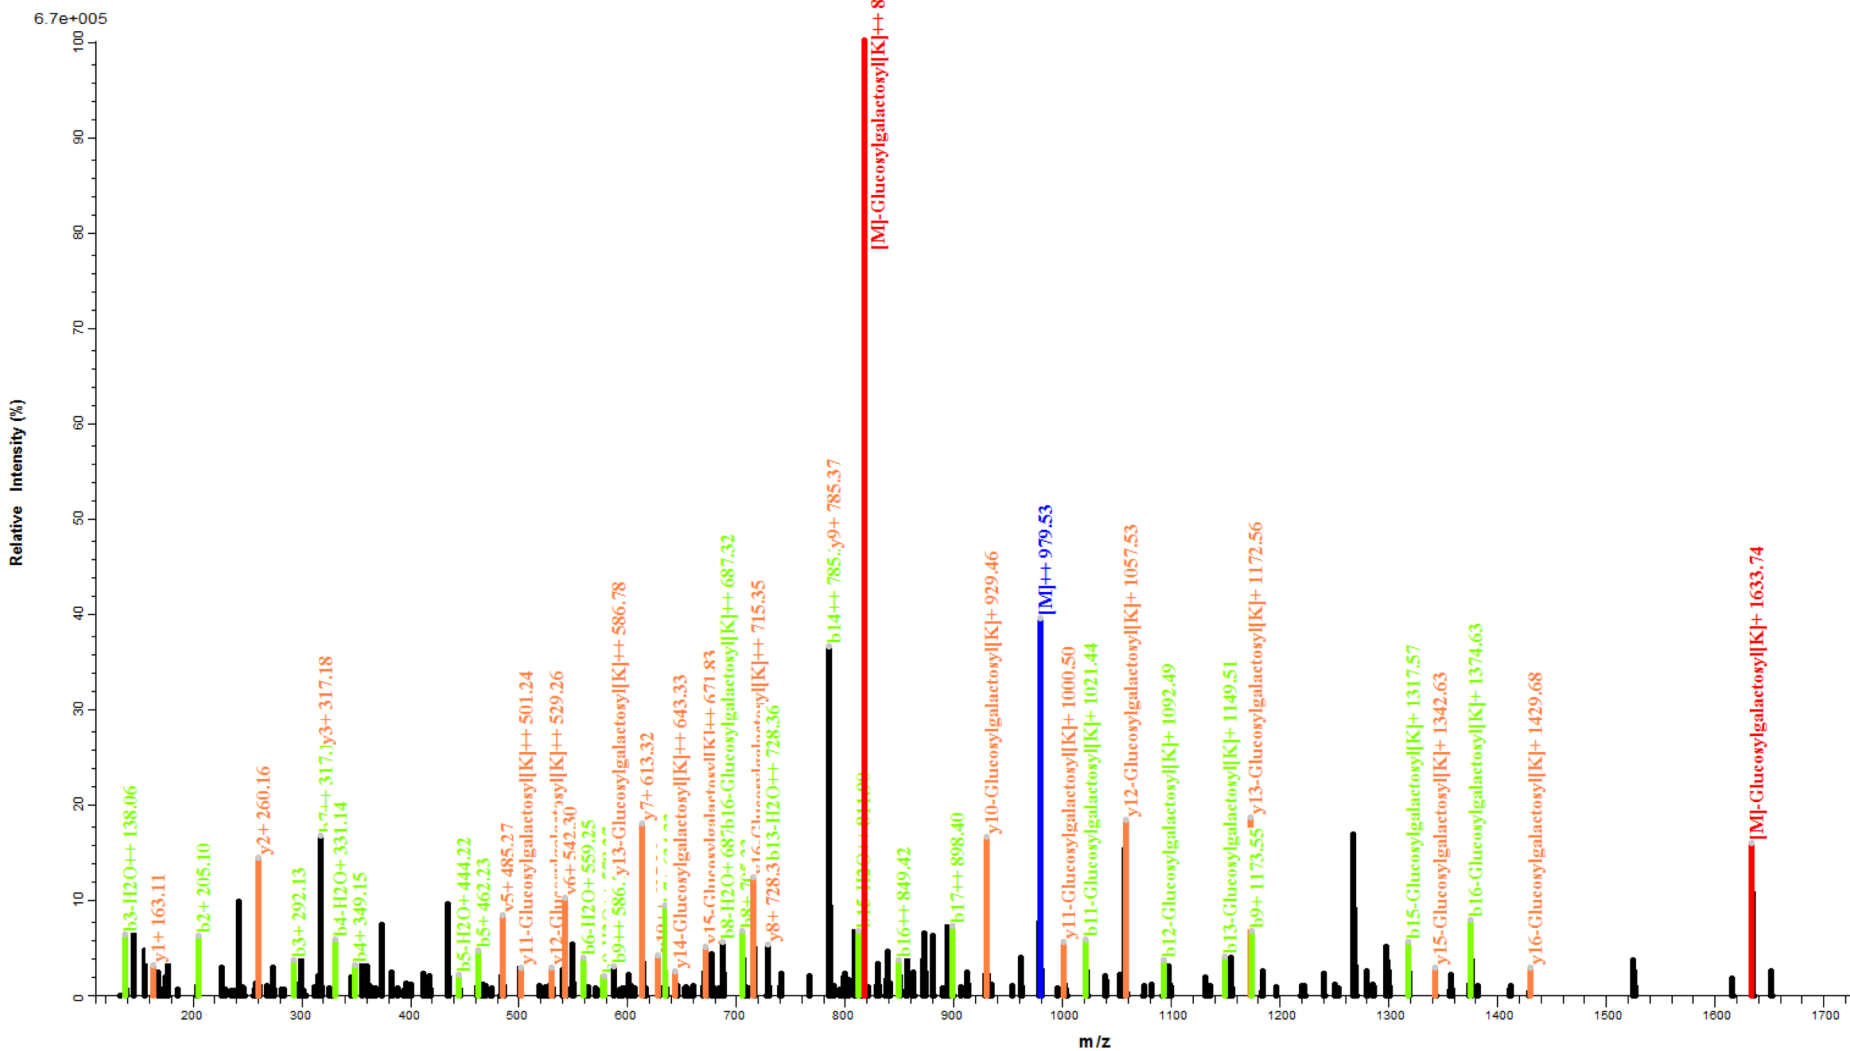

# PSM showing the identification of Galactosyl-hydroxylysine<sup>448</sup>

Human col1a1 chain

m/z = 852.3983<sup>+3</sup>

Q-Exactive HF, HCD Fragmentation

## S13

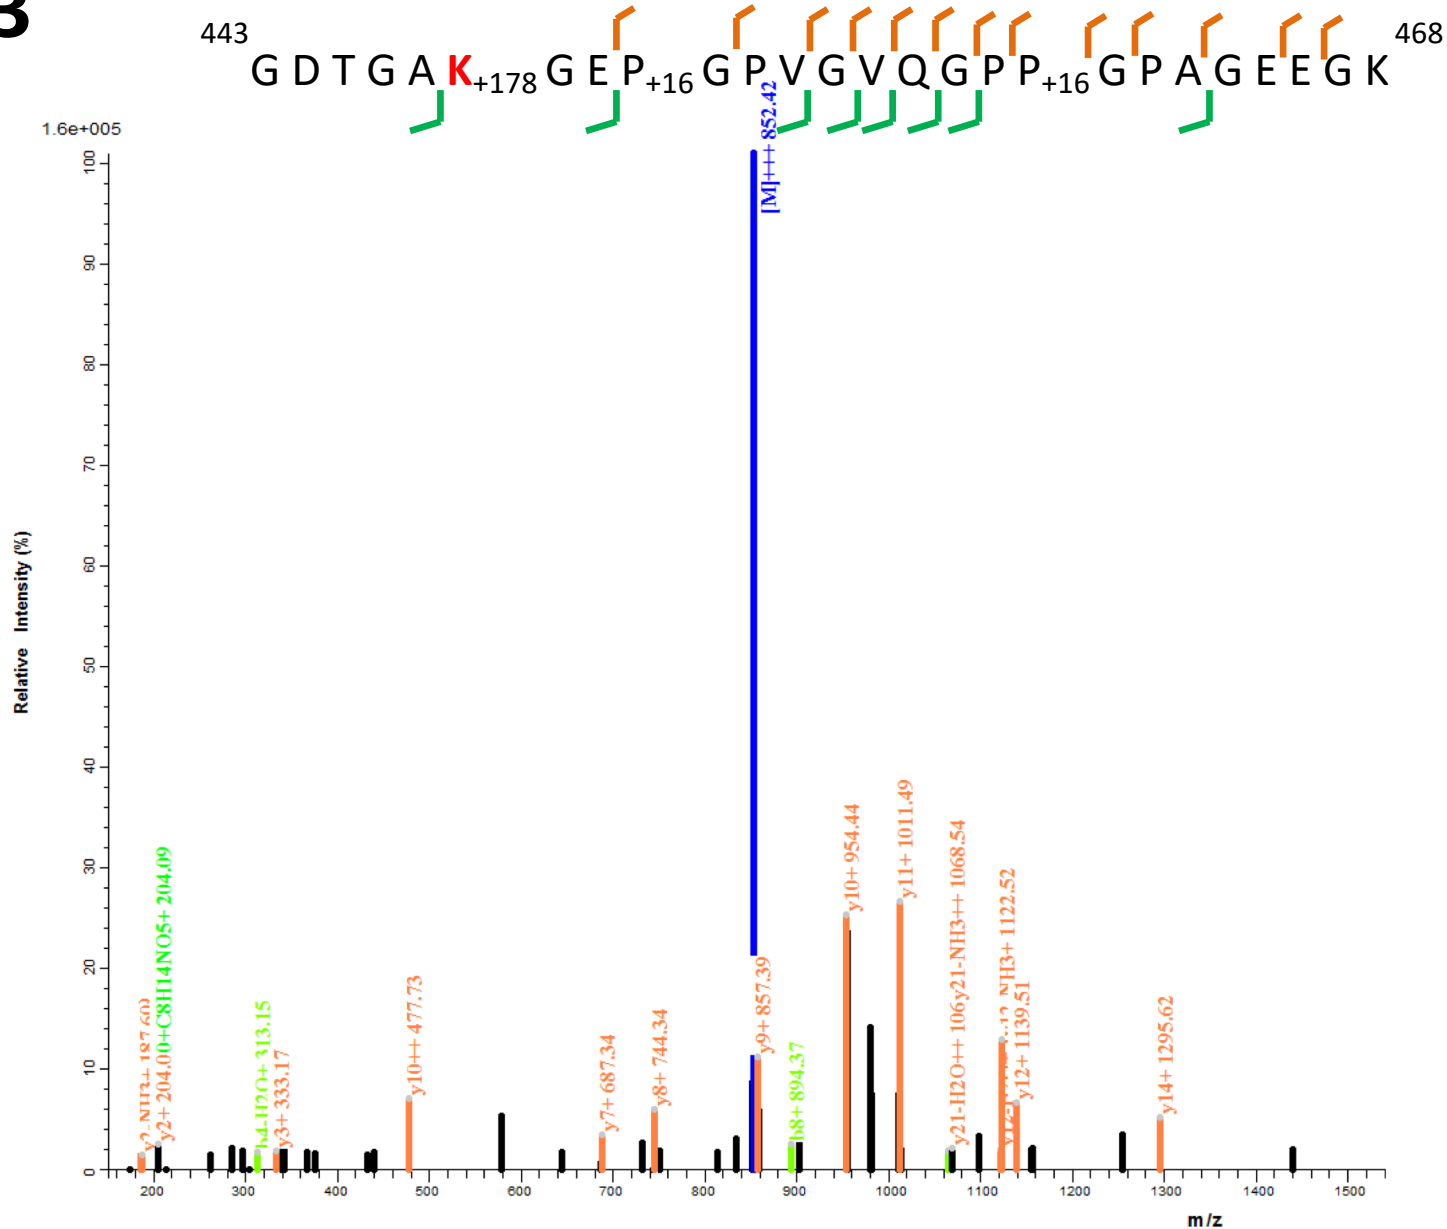



# PSM showing the identification of Glucosylgalactosyl-hydroxylysine<sup>448</sup>

m/z = 906.4133<sup>+3</sup>

Human col1a1 chain

Q-Exactive HF, HCD Fragmentation

## S14

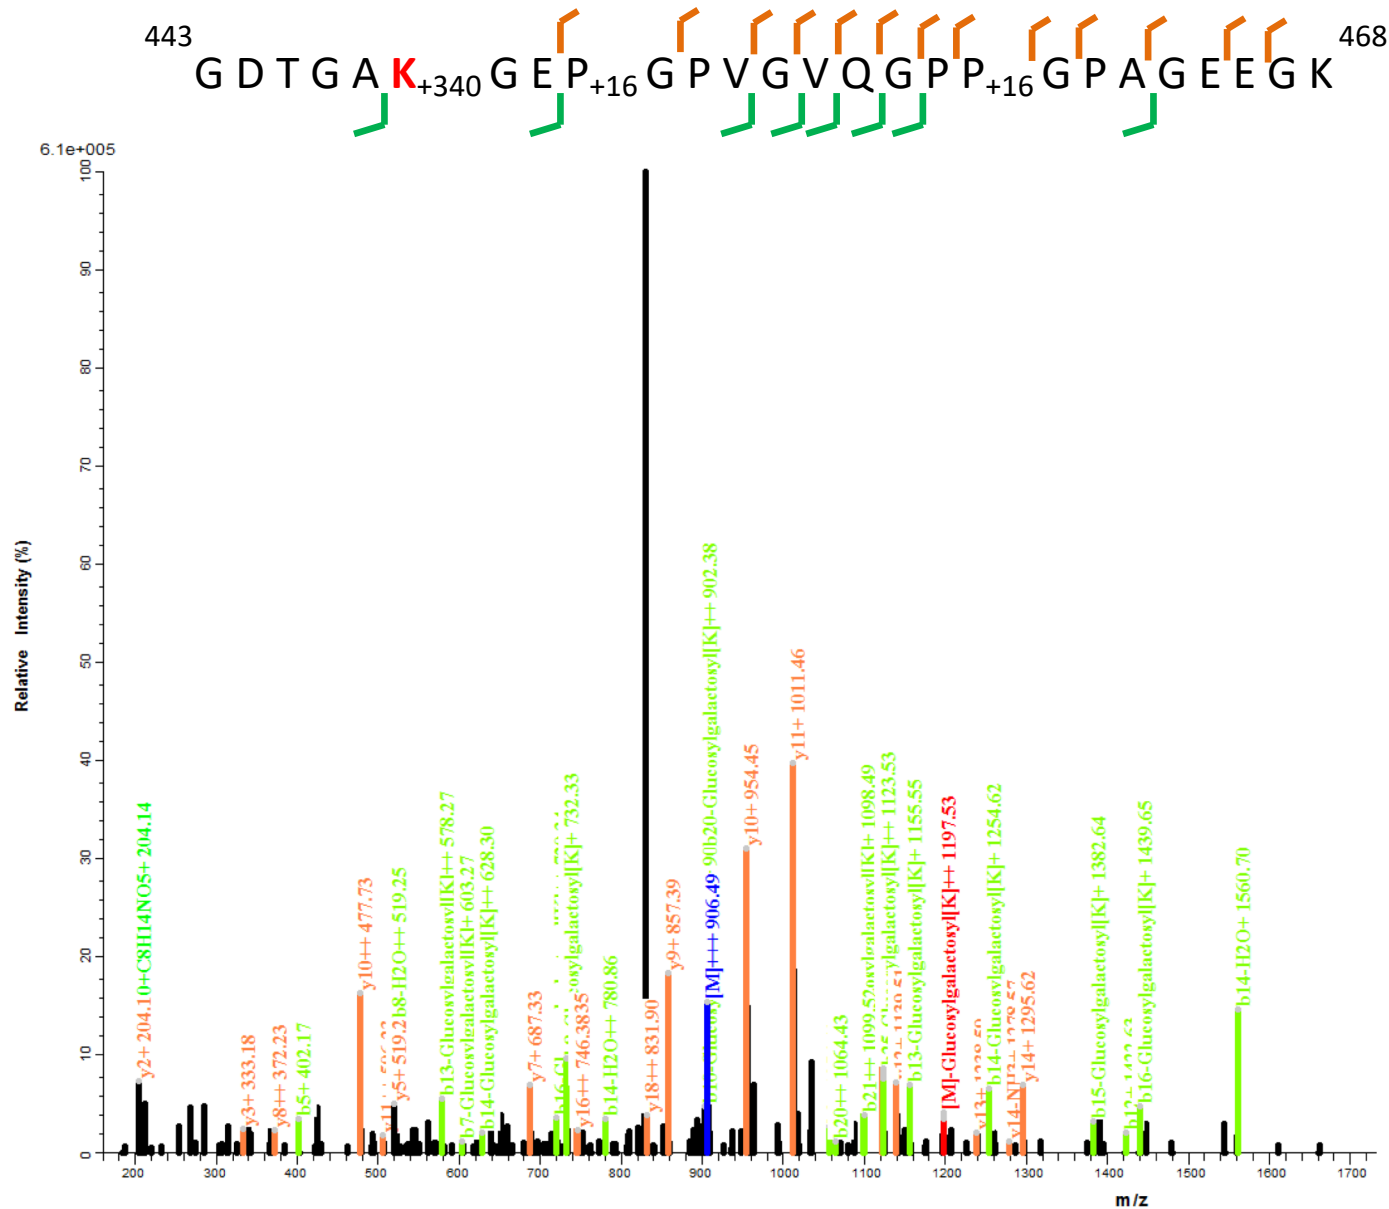

PSM showing the identification of Galactosyl-hydroxylysine<sup>520</sup>

Human col1a1 chain

m/z= 650.3116<sup>+4</sup>

Q-Exactive HF, HCD Fragmentation

**S15**

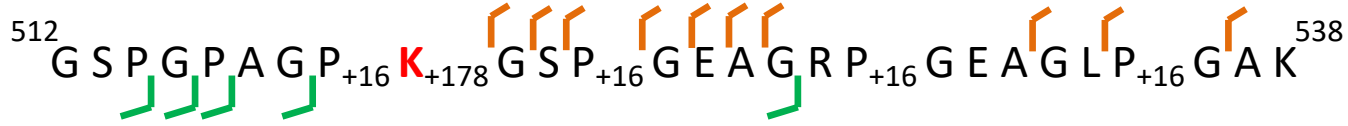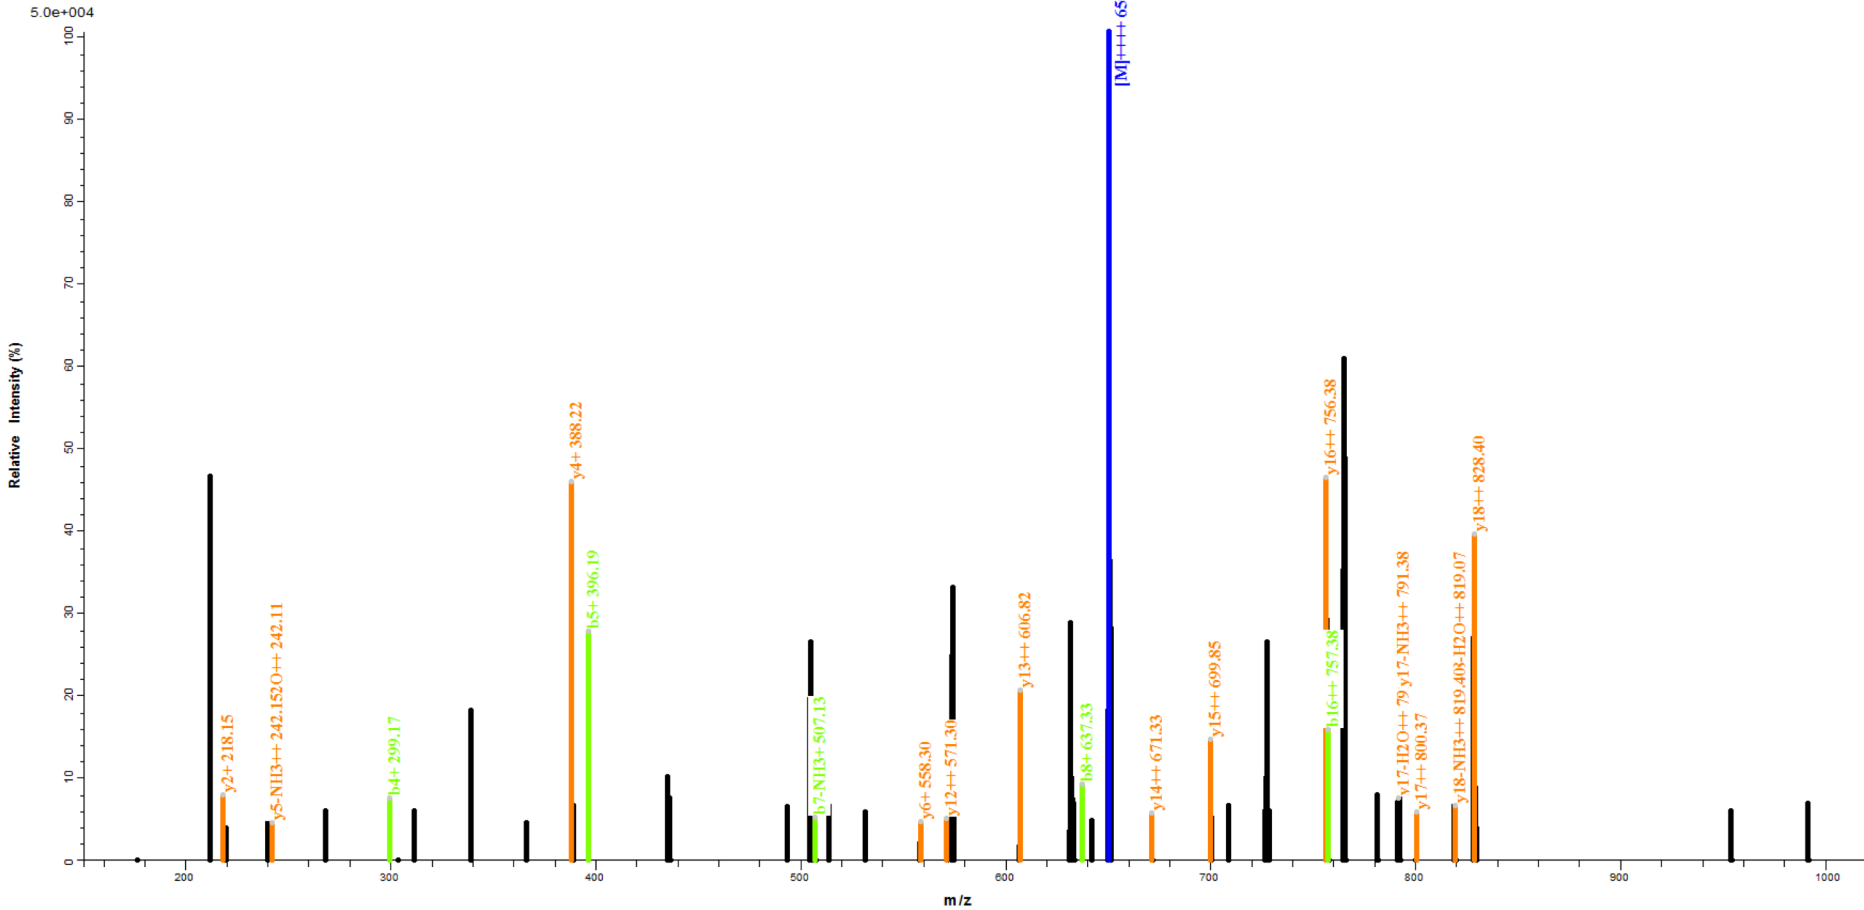

# PSM showing the identification of Glucosylgalactosyl-hydroxylysine<sup>520</sup>

m/z = 920.7651<sup>+3</sup>

Human col1a1 chain

Q-Exactive HF, HCD Fragmentation

## S16

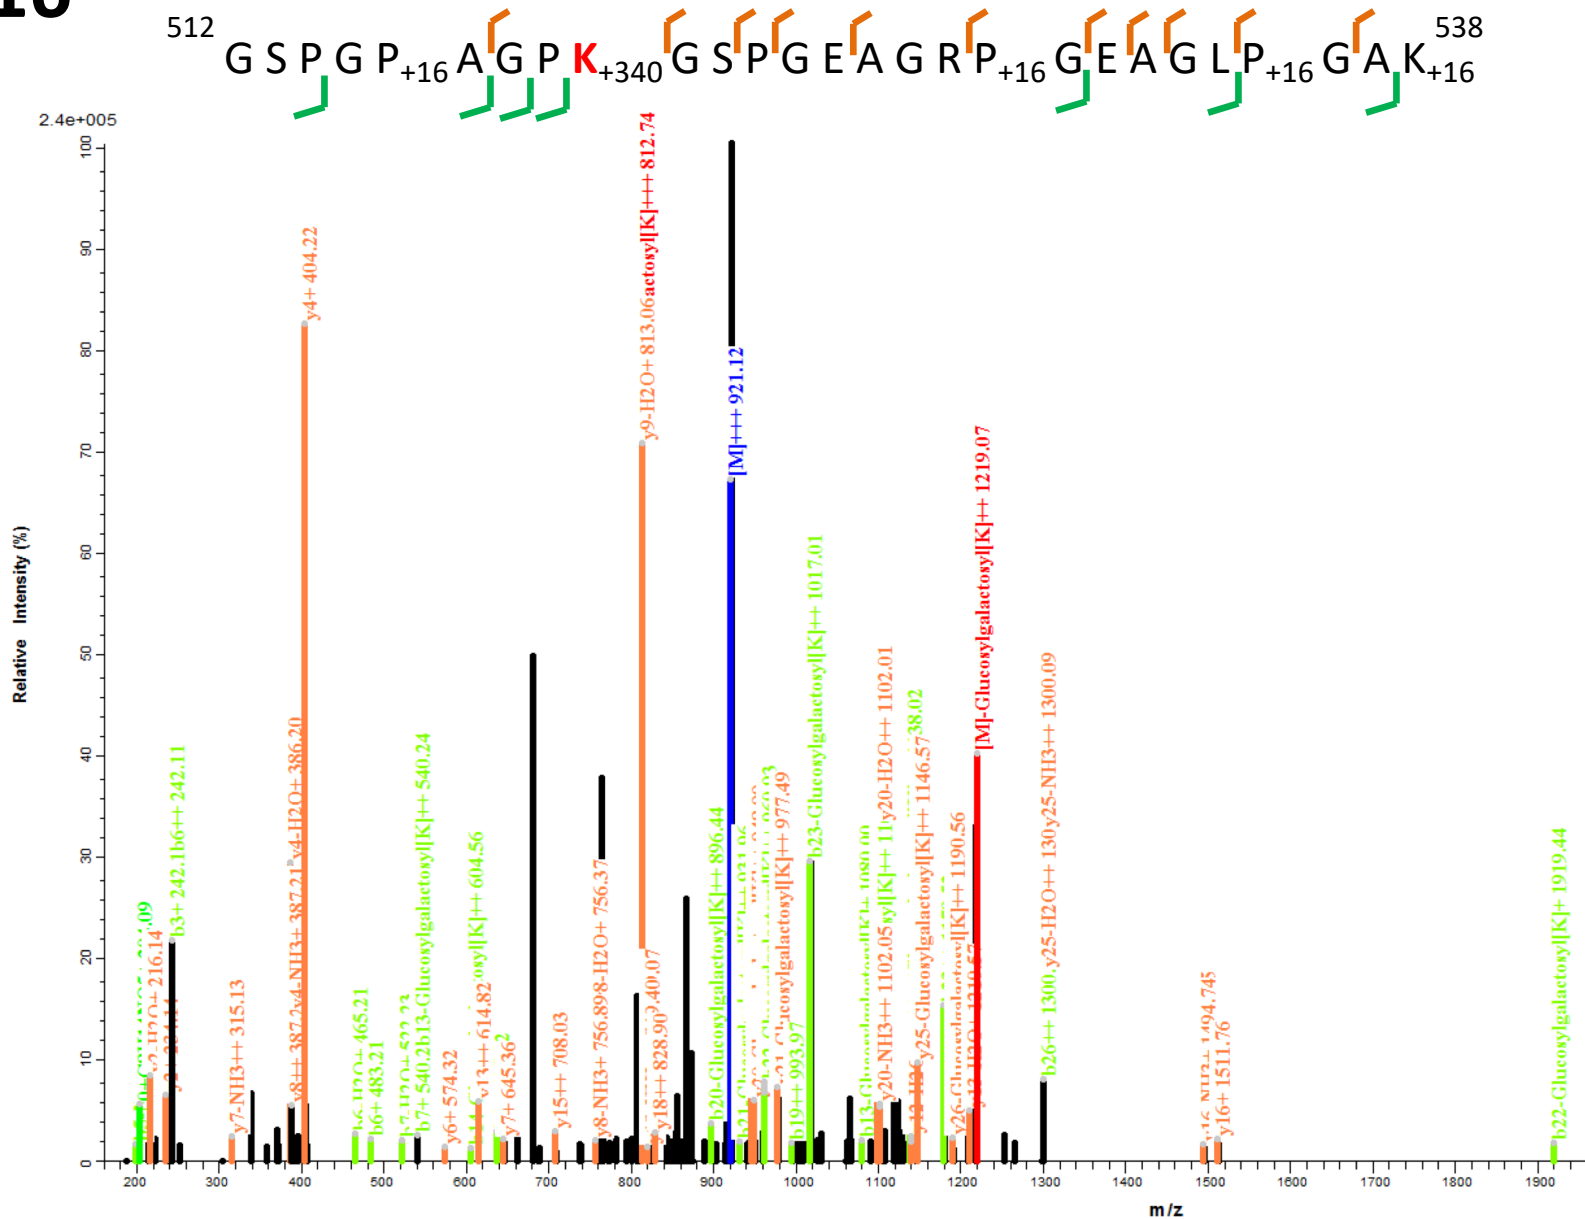

# PSM showing the identification of Galactosyl-hydroxylysine<sup>586</sup>

Human col1a1 chain

m/z = 674.9879<sup>+3</sup>

## S17

Q-Exactive HF, HCD Fragmentation

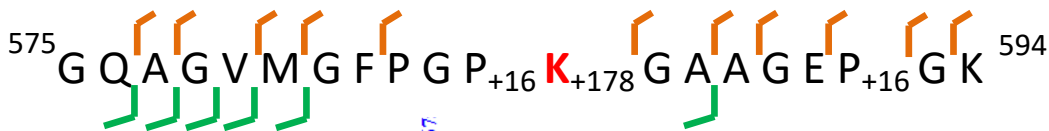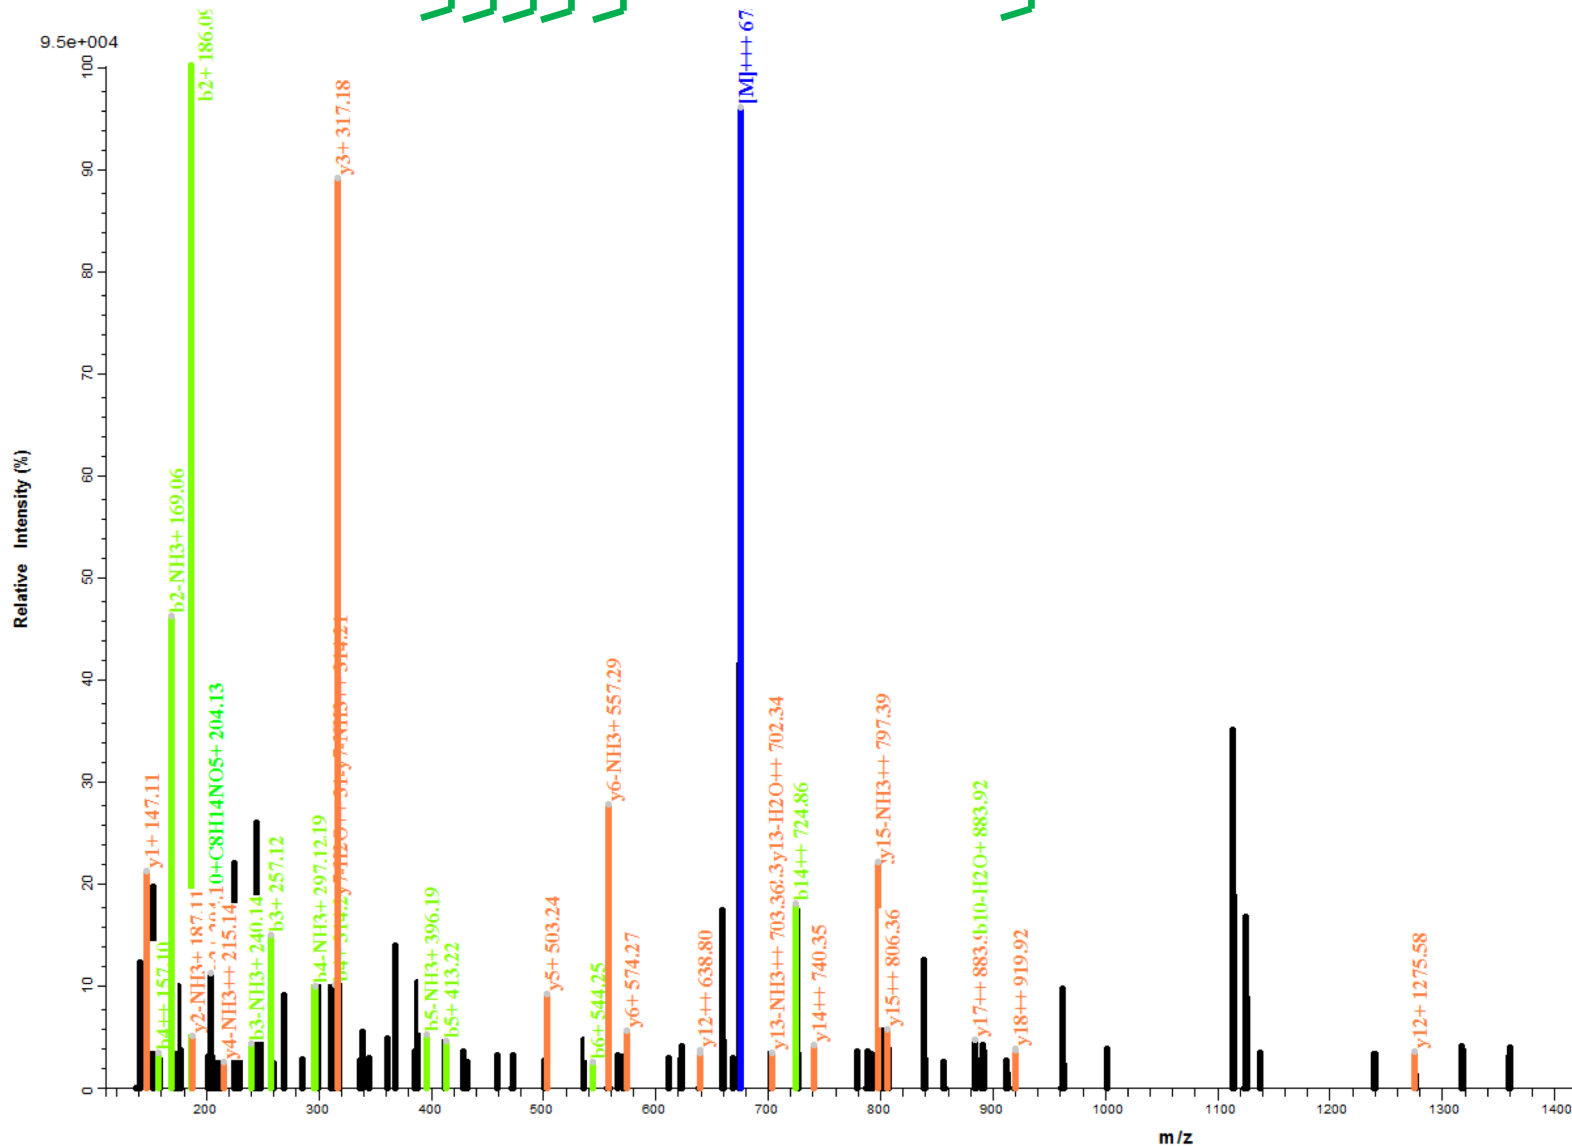

PSM showing the identification of Glucosylgalactosyl-hydroxylysine<sup>586</sup>

Human col1a1 chain

Q-Exactive HF, HCD Fragmentation

m/z = 729.0048<sup>+3</sup>

**S18**

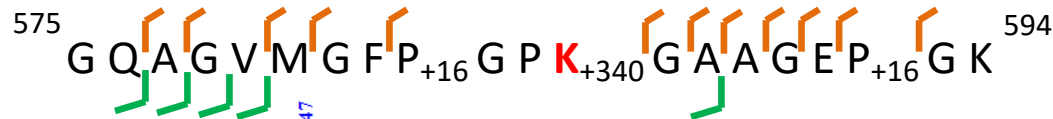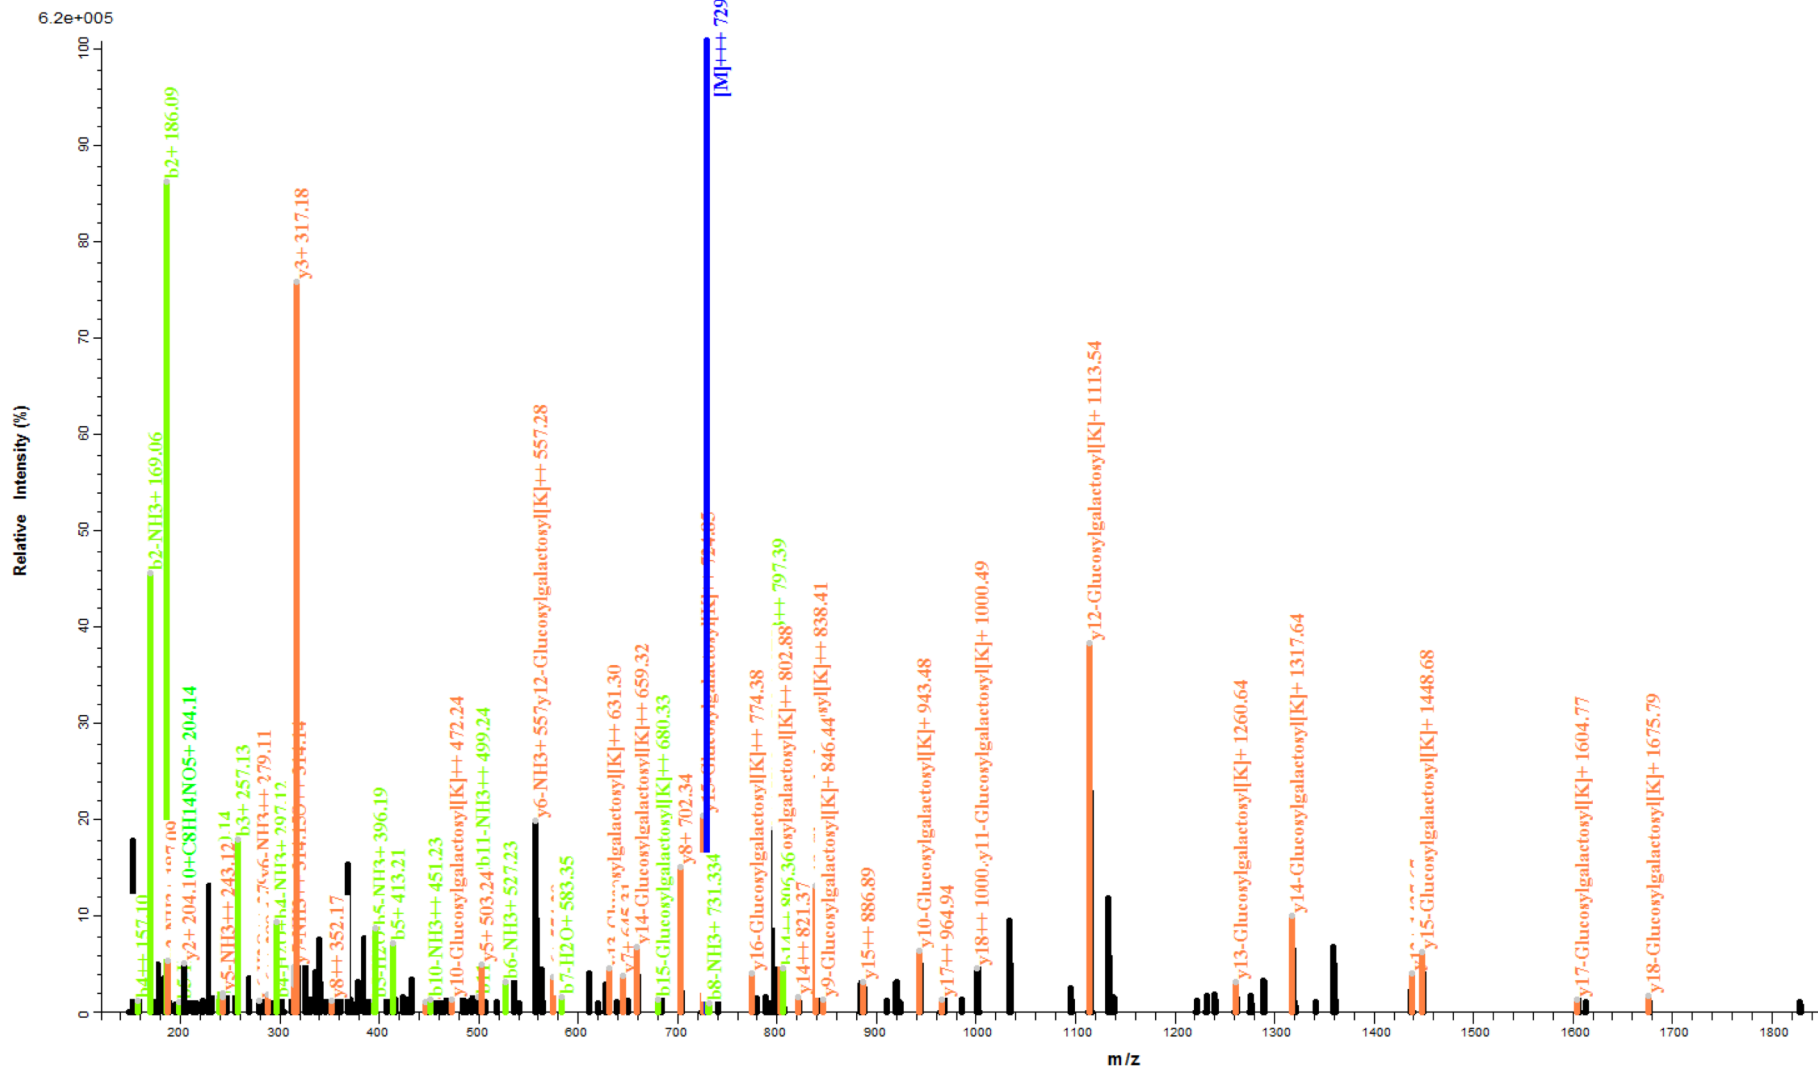

# PSM showing the identification of Glucosylgalactosyl-hydroxylysine<sup>862</sup>

Human col1a1 chain

m/z= 963.8028<sup>+3</sup>

Q-Exactive HF, HCD Fragmentation

## S19

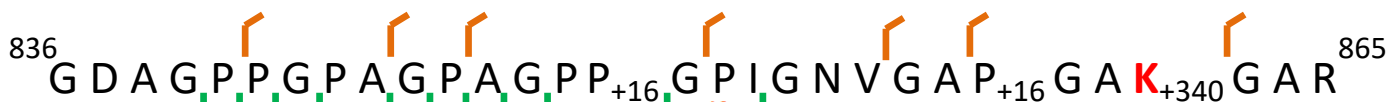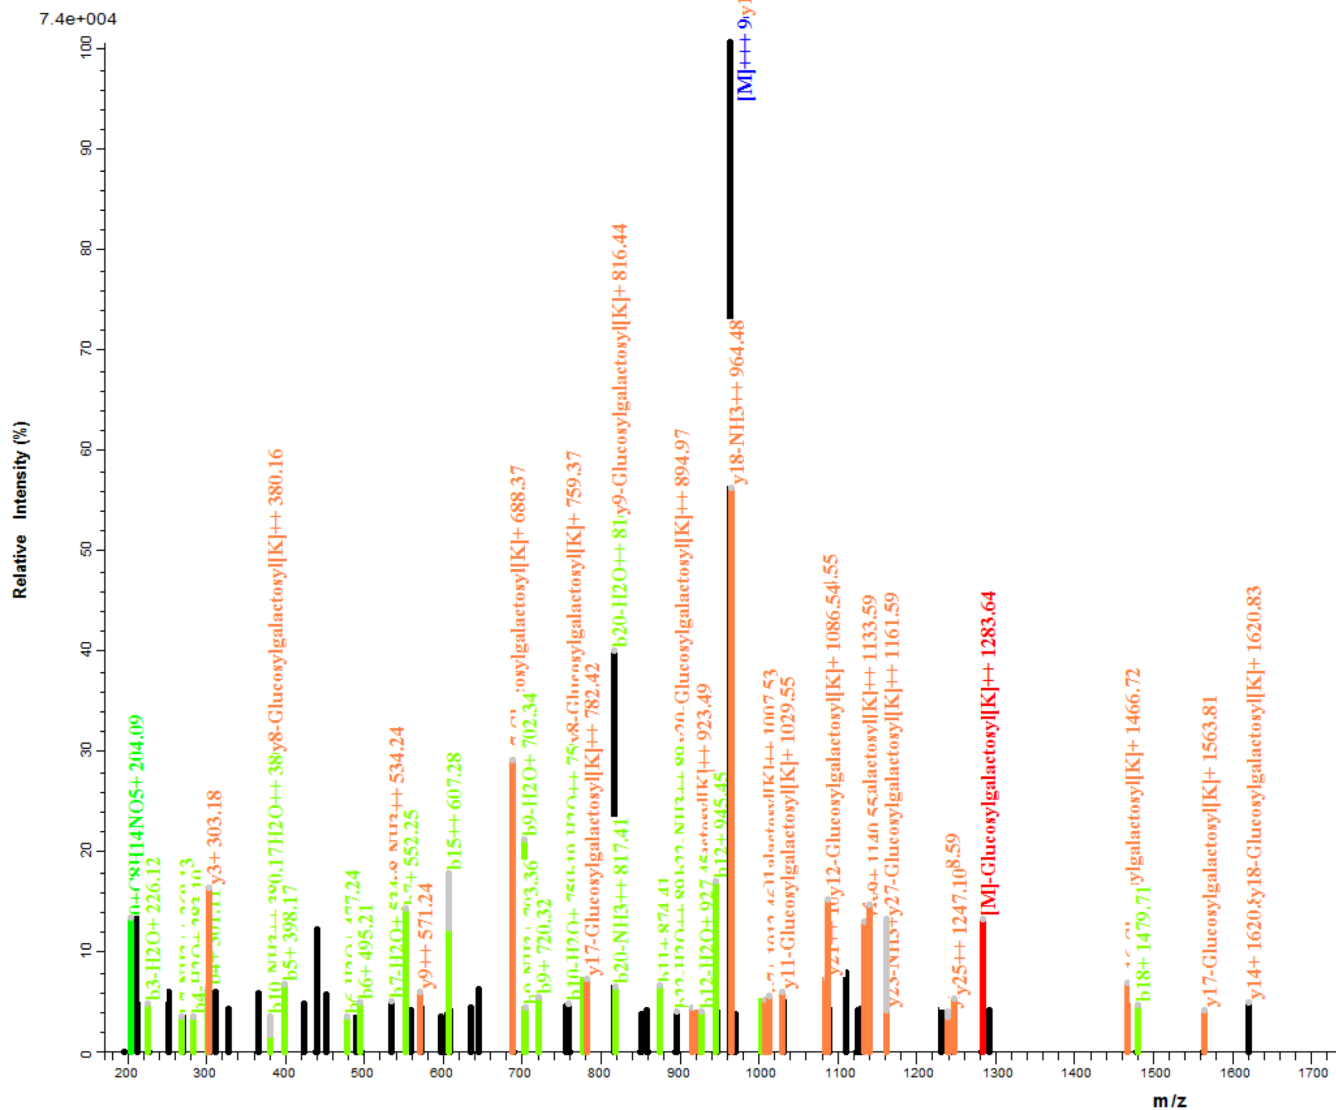

## References

- [1] L. Knüppel, Y. Ishikawa, M. Aichler, K. Heinzelmann, R. Hatz, J. Behr, A. Walch, H.P. Bächinger, O. Eickelberg, C.A. Staab-Weijnitz, A Novel Antifibrotic Mechanism of Nintedanib and Pirfenidone. Inhibition of Collagen Fibril Assembly, *Am. J. Respir. Cell Mol. Biol.* 57(1) (2017) 77-90.
- [2] C.A. Staab-Weijnitz, I.E. Fernandez, L. Knüppel, J. Maul, K. Heinzelmann, B.M. Juan-Guardela, E. Hennen, G. Preissler, H. Winter, C. Neurohr, R. Hatz, M. Lindner, J. Behr, N. Kaminski, O. Eickelberg, FK506-binding Protein 10 is a Potential Novel Drug Target for Idiopathic Pulmonary Fibrosis, *Am. J. Respir. Crit. Care Med.* (2015).
- [3] H.B. Schiller, I.E. Fernandez, G. Burgstaller, C. Schaab, R.A. Scheltema, T. Schwarzmayr, T.M. Strom, O. Eickelberg, M. Mann, Time- and compartment-resolved proteome profiling of the extracellular niche in lung injury and repair, *Mol. Syst. Biol.* 11(7) (2015) 819.
- [4] H.B. Schiller, C.H. Mayr, G. Leuschner, M. Strunz, C. Staab-Weijnitz, S. Preisendorfer, B. Eckes, P. Moinzadeh, T. Krieg, D.A. Schwartz, R.A. Hatz, J. Behr, M. Mann, O. Eickelberg, Deep Proteome Profiling Reveals Common Prevalence of MZB1-Positive Plasma B Cells in Human Lung and Skin Fibrosis, *Am. J. Respir. Crit. Care Med.* 196(10) (2017) 1298-1310.
- [5] R.X. Sun, M.Q. Dong, C.Q. Song, H. Chi, B. Yang, L.Y. Xiu, L. Tao, Z.Y. Jing, C. Liu, L.H. Wang, Y. Fu, S.M. He, Improved peptide identification for proteomic analysis based on comprehensive characterization of electron transfer dissociation spectra, *J. Proteome Res.* 9(12) (2010) 6354-67.
